# Supplementary material for: Sn(ii)–carbon bond reactivity: radical generation and consumption via reactions of a stannylene with alkynes
Source: Royal Society of Chemistry journal article supplement (doi:10.1039/d3cc04014c), 2023-01-01
Supplement: d3cc04014c1.pdf [file d3cc04014c1.pdf]

## WZ13FMI

b"n n

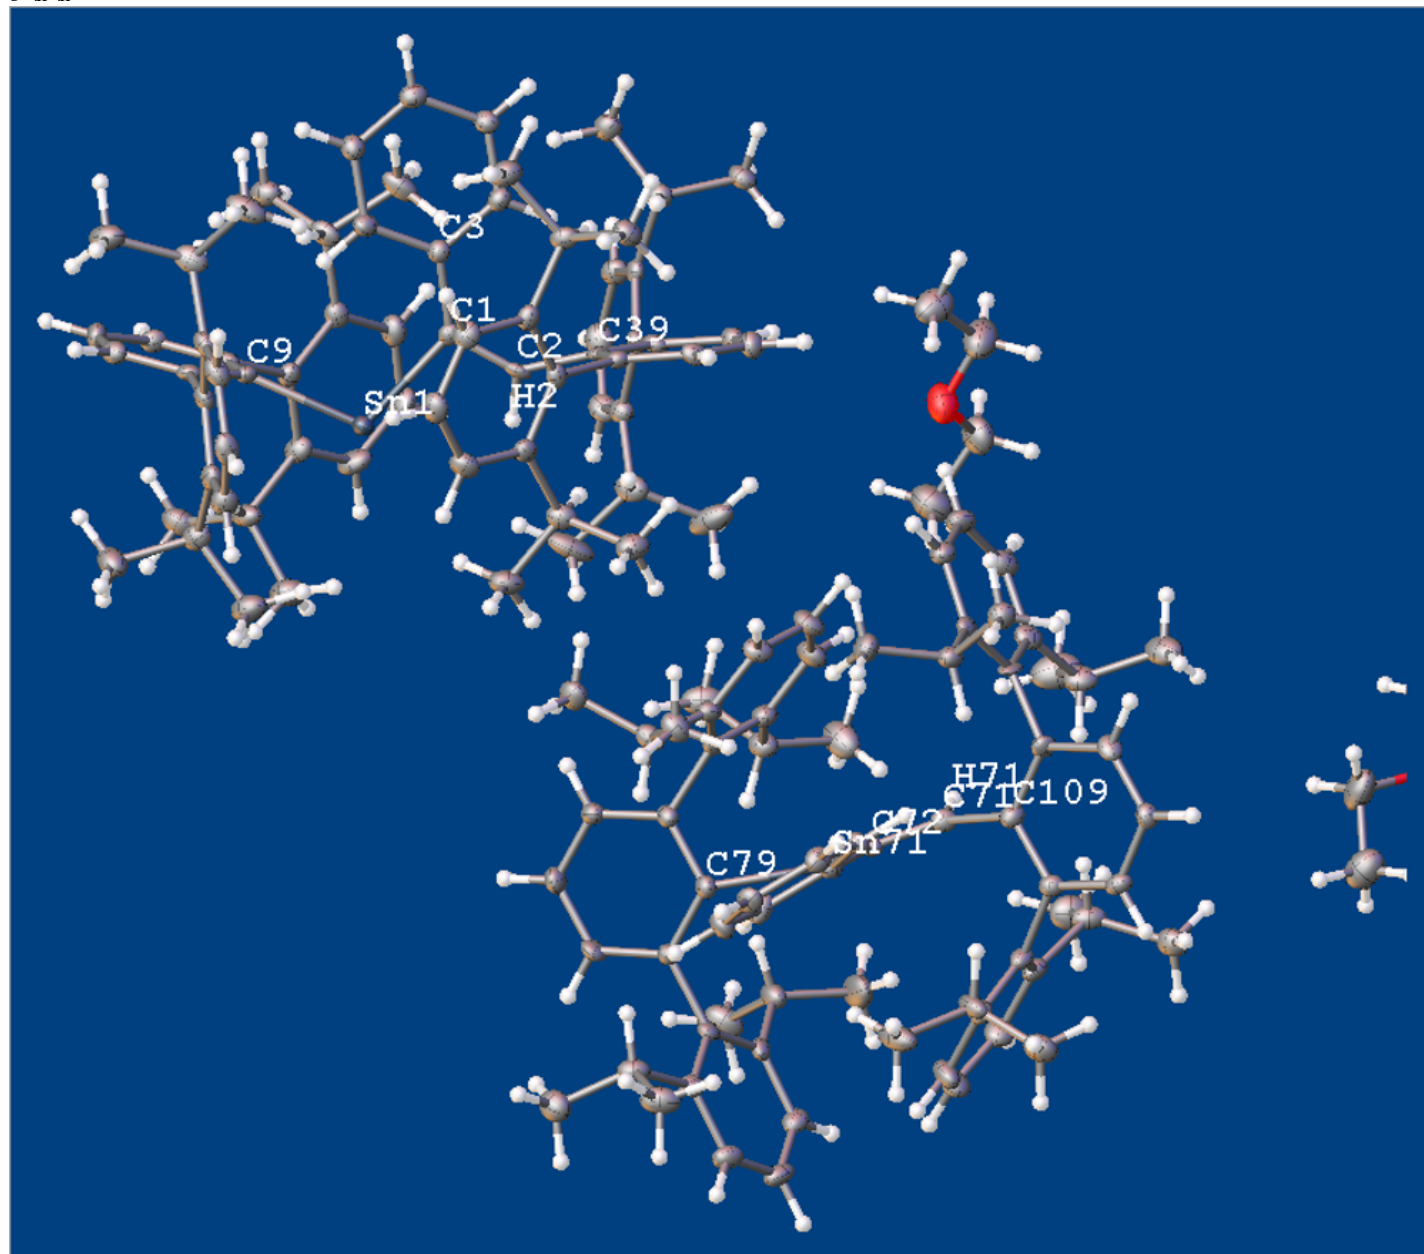

n "

**Table 1** Crystal data and structure refinement for WZ13FMI.

|                                        |                                          |
|----------------------------------------|------------------------------------------|
| Identification code                    | WZ13FMI                                  |
| Empirical formula                      | C <sub>72</sub> H <sub>90</sub> OSn      |
| Formula weight                         | 1090.12                                  |
| Temperature/K                          | 90.15                                    |
| Crystal system                         | triclinic                                |
| Space group                            | P-1                                      |
| a/Å                                    | 17.8418(9)                               |
| b/Å                                    | 17.8598(9)                               |
| c/Å                                    | 19.2380(10)                              |
| $\alpha$ /°                            | 88.9389(8)                               |
| $\beta$ /°                             | 81.5494(8)                               |
| $\gamma$ /°                            | 89.9199(8)                               |
| Volume/Å <sup>3</sup>                  | 6062.6(5)                                |
| Z                                      | 4                                        |
| $\rho_{\text{calc}}$ /cm <sup>3</sup>  | 1.194                                    |
| $\mu$ /mm <sup>-1</sup>                | 0.464                                    |
| F(000)                                 | 2320.0                                   |
| Crystal size/mm <sup>3</sup>           | 0.288 × 0.218 × 0.188                    |
| Radiation                              | MoK $\alpha$ ( $\lambda$ = 0.71073)      |
| 2 $\theta$ range for data collection/° | 3.674 to 50.5                            |
| Index ranges                           | -21 ≤ h ≤ 21, -21 ≤ k ≤ 21, -23 ≤ l ≤ 23 |

|                                                |                                                                   |
|------------------------------------------------|-------------------------------------------------------------------|
| Reflections collected                          | 43726                                                             |
| Independent reflections                        | 21946 [ $R_{\text{int}} = 0.0589$ , $R_{\text{sigma}} = 0.0826$ ] |
| Data/restraints/parameters                     | 21946/149/1434                                                    |
| Goodness-of-fit on $F^2$                       | 1.136                                                             |
| Final R indexes [ $I \geq 2\sigma(I)$ ]        | $R_1 = 0.0617$ , $wR_2 = 0.1082$                                  |
| Final R indexes [all data]                     | $R_1 = 0.0930$ , $wR_2 = 0.1173$                                  |
| Largest diff. peak/hole / $e \text{ \AA}^{-3}$ | 0.68/-0.84                                                        |

**Table 2 Fractional Atomic Coordinates ( $\times 10^4$ ) and Equivalent Isotropic Displacement Parameters ( $\text{\AA}^2 \times 10^3$ ) for WZ13FMI.  $U_{\text{eq}}$  is defined as 1/3 of the trace of the orthogonalised  $U_{\text{IJ}}$  tensor.**

| Atom | x          | y          | z           | $U(\text{eq})$ |
|------|------------|------------|-------------|----------------|
| Sn1  | 2980.2(2)  | 2527.2(2)  | 10488.8(2)  | 18.71(9)       |
| C2   | 2464(2)    | 2300(2)    | 9168(2)     | 16.3(10)       |
| C1   | 2137(2)    | 2635(2)    | 9748(2)     | 16.0(10)       |
| C3   | 1393.3(13) | 3054.1(17) | 9828.8(16)  | 18.1(10)       |
| C4   | 874.6(16)  | 2927.4(16) | 9370.8(13)  | 19.4(10)       |
| C5   | 159.6(15)  | 3251.4(17) | 9492.5(16)  | 19.0(11)       |
| C6   | -36.6(15)  | 3702(2)    | 10072.2(19) | 22.6(11)       |
| C7   | 482.1(19)  | 3828.7(19) | 10530.3(16) | 22.0(12)       |
| C8   | 1197.1(17) | 3504.8(18) | 10408.6(15) | 21.3(11)       |
| Sn1B | 2917(5)    | 2199(5)    | 9383(4)     | 23.9(13)       |
| C1B  | 2560(30)   | 2930(40)   | 10730(30)   | 10(20)         |
| C2B  | 2150(30)   | 2780(40)   | 10220(20)   | 16(2)          |
| C3B  | 1410(20)   | 3130(40)   | 10090(30)   | 18(2)          |
| C4B  | 960(30)    | 2750(30)   | 9680(40)    | 19(2)          |
| C5B  | 220(30)    | 2990(40)   | 9650(40)    | 19(2)          |
| C6B  | -60(30)    | 3610(50)   | 10040(50)   | 22(2)          |
| C7B  | 390(40)    | 3980(50)   | 10450(40)   | 22(2)          |
| C8B  | 1120(40)   | 3740(40)   | 10480(20)   | 21(2)          |
| C9   | 2493(2)    | 2942(2)    | 11538(2)    | 16.3(9)        |
| C10  | 2609(2)    | 3635(2)    | 11848(2)    | 16.5(9)        |
| C11  | 2378(2)    | 3715(2)    | 12564(2)    | 20.2(10)       |
| C12  | 2047(3)    | 3125(2)    | 12980(2)    | 22.1(10)       |
| C13  | 1962(2)    | 2438(2)    | 12679(2)    | 18.5(10)       |
| C14  | 2193(2)    | 2346(2)    | 11969(2)    | 17.3(10)       |
| C15  | 3043(2)    | 4266(2)    | 11423(2)    | 18.4(10)       |
| C16  | 3837(2)    | 4204(2)    | 11253(2)    | 21.5(10)       |
| C17  | 4241(3)    | 4786(3)    | 10873(2)    | 26.0(11)       |
| C18  | 3874(3)    | 5424(3)    | 10692(2)    | 27.5(11)       |
| C19  | 3100(3)    | 5499(3)    | 10880(2)    | 25.9(11)       |
| C20  | 2668(3)    | 4926(2)    | 11249(2)    | 21.6(10)       |
| C21  | 4275(3)    | 3567(2)    | 11540(2)    | 23.6(11)       |
| C22  | 4958(3)    | 3298(3)    | 11028(3)    | 36.7(13)       |
| C23  | 4527(3)    | 3789(3)    | 12234(3)    | 35.6(13)       |
| C24  | 1822(3)    | 5051(3)    | 11472(3)    | 26.7(11)       |
| C25  | 1441(3)    | 5412(3)    | 10882(3)    | 36.9(13)       |
| C26  | 1669(3)    | 5530(3)    | 12135(3)    | 35.6(13)       |
| C27  | 2176(2)    | 1585(2)    | 11630(2)    | 18.4(10)       |
| C28  | 1536(2)    | 1344(2)    | 11353(2)    | 20.0(10)       |
| C29  | 1554(3)    | 639(3)     | 11042(2)    | 26.7(11)       |
| C30  | 2179(3)    | 176(3)     | 11023(3)    | 31.9(12)       |
| C31  | 2803(3)    | 410(3)     | 11302(3)    | 30.7(12)       |
| C32  | 2820(3)    | 1115(2)    | 11600(2)    | 23.6(11)       |
| C33  | 824(2)     | 1814(2)    | 11416(2)    | 23.3(11)       |
| C34  | 365(3)     | 1704(3)    | 10808(3)    | 31.6(12)       |
| C35  | 330(3)     | 1635(3)    | 12118(3)    | 27.6(11)       |
| C36  | 3517(3)    | 1344(3)    | 11916(3)    | 27.2(11)       |
| C37  | 4264(3)    | 1097(3)    | 11479(3)    | 40.1(14)       |
| C38  | 3461(3)    | 1023(3)    | 12675(3)    | 34.5(13)       |
| C39  | 2334(2)    | 2285(2)    | 8420(2)     | 14.5(9)        |
| C40  | 2571(2)    | 2912(2)    | 7984(2)     | 15.9(9)        |
| C41  | 2557(2)    | 2869(2)    | 7266(2)     | 18.4(10)       |
| C42  | 2333(3)    | 2225(2)    | 6968(2)     | 22.9(10)       |
| C43  | 2107(2)    | 1605(2)    | 7392(2)     | 20.2(10)       |
| C44  | 2109(2)    | 1629(2)    | 8120(2)     | 17.6(10)       |
| C45  | 2873(2)    | 3599(2)    | 8300(2)     | 18.0(10)       |
| C46  | 2429(2)    | 4246(2)    | 8419(2)     | 19.2(10)       |
| C47  | 2712(3)    | 4835(2)    | 8769(2)     | 22.4(10)       |
| C48  | 3422(3)    | 4797(3)    | 8978(2)     | 27.4(11)       |
| C49  | 3868(3)    | 4170(3)    | 8837(2)     | 25.9(11)       |
| C50  | 3606(2)    | 3570(2)    | 8494(2)     | 19.4(10)       |
| C51  | 1664(2)    | 4324(2)    | 8164(2)     | 20.2(10)       |
| C52  | 1086(3)    | 4778(3)    | 8656(3)     | 29.1(12)       |
| C53  | 1747(3)    | 4688(3)    | 7427(2)     | 27.2(11)       |
| C54  | 4130(3)    | 2903(3)    | 8292(2)     | 24.3(11)       |
| C55  | 4730(3)    | 2775(3)    | 8772(3)     | 32.2(12)       |
| C56  | 4500(3)    | 2980(3)    | 7532(3)     | 30.7(12)       |
| C57  | 1904(2)    | 943(2)     | 8563(2)     | 16.0(9)        |
| C58  | 2480(2)    | 486(2)     | 8772(2)     | 20.2(10)       |
| C59  | 2276(3)    | -147(2)    | 9188(2)     | 25.2(11)       |

| Atom | x         | y          | z          | U(eq)     |
|------|-----------|------------|------------|-----------|
| C60  | 1529(3)   | -331(3)    | 9400(2)    | 27.3(11)  |
| C61  | 967(3)    | 105(2)     | 9187(2)    | 23.5(11)  |
| C62  | 1133(2)   | 738(2)     | 8760(2)    | 16.5(9)   |
| C63  | 3313(3)   | 643(3)     | 8497(3)    | 27.9(11)  |
| C64  | 3834(3)   | 513(3)     | 9049(3)    | 48.1(16)  |
| C65  | 3562(3)   | 167(3)     | 7858(3)    | 47.6(16)  |
| C66  | 493(2)    | 1160(2)    | 8483(2)    | 20.2(10)  |
| C67  | -202(3)   | 1290(3)    | 9039(2)    | 27.0(11)  |
| C68  | 257(3)    | 763(3)     | 7855(2)    | 25.2(11)  |
| Sn71 | 7602.5(2) | 1926.6(2)  | 5501.7(2)  | 16.81(11) |
| C71  | 7408(3)   | 2694(3)    | 4210(3)    | 17.7(11)  |
| C72  | 7684(3)   | 2920(3)    | 4781(3)    | 15.5(12)  |
| C73  | 8065(2)   | 3657.6(17) | 4870(2)    | 16.2(13)  |
| C74  | 7985(3)   | 4258(2)    | 4416(2)    | 16.7(13)  |
| C75  | 8301(4)   | 4949(2)    | 4527(3)    | 21.3(15)  |
| C76  | 8696(5)   | 5040(2)    | 5091(3)    | 22.0(18)  |
| C77  | 8775(4)   | 4439(3)    | 5544(3)    | 23.4(18)  |
| C78  | 8460(3)   | 3748(2)    | 5433.9(19) | 20.9(15)  |
| Sn72 | 7333.7(7) | 2164.2(7)  | 4433.8(6)  | 20.5(3)   |
| C71B | 7844(11)  | 2268(12)   | 5803(11)   | 34(5)     |
| C72B | 7858(9)   | 2745(6)    | 5211(8)    | 18(4)     |
| C73B | 8096(8)   | 3555(5)    | 5212(6)    | 17(2)     |
| C74B | 7956(8)   | 4040(6)    | 4673(6)    | 16.7(14)  |
| C75B | 8196(13)  | 4781(7)    | 4664(10)   | 22(2)     |
| C76B | 8577(16)  | 5036(7)    | 5195(12)   | 22(2)     |
| C77B | 8717(13)  | 4551(8)    | 5734(10)   | 24(2)     |
| C78B | 8476(10)  | 3810(7)    | 5743(6)    | 21(2)     |
| C79  | 7815(2)   | 2241(2)    | 6576(2)    | 19.0(10)  |
| C80  | 8419(2)   | 2007(2)    | 6920(2)    | 17.8(10)  |
| C81  | 8321(3)   | 1991(3)    | 7658(2)    | 24.1(11)  |
| C82  | 7642(3)   | 2207(3)    | 8050(2)    | 26.3(11)  |
| C83  | 7045(2)   | 2430(2)    | 7711(2)    | 21.2(10)  |
| C84  | 7124(2)   | 2442(2)    | 6980(2)    | 18.9(10)  |
| C85  | 9147(2)   | 1721(2)    | 6521(2)    | 18.4(10)  |
| C86  | 9177(2)   | 981(2)     | 6263(2)    | 20.0(10)  |
| C87  | 9861(3)   | 719(3)     | 5914(2)    | 24.1(11)  |
| C88  | 10510(3)  | 1157(3)    | 5828(2)    | 27.2(11)  |
| C89  | 10481(3)  | 1873(3)    | 6086(2)    | 25.9(11)  |
| C90  | 9808(2)   | 2169(2)    | 6431(2)    | 19.4(10)  |
| C91  | 8508(3)   | 446(3)     | 6417(2)    | 27.3(11)  |
| C92  | 8398(3)   | -36(3)     | 5789(3)    | 51.9(17)  |
| C93  | 8613(3)   | -54(3)     | 7048(3)    | 39.4(14)  |
| C94  | 9811(3)   | 2955(2)    | 6728(2)    | 24.2(11)  |
| C95  | 10278(3)  | 3512(3)    | 6216(3)    | 33.9(13)  |
| C96  | 10122(3)  | 2947(3)    | 7435(3)    | 33.7(12)  |
| C97  | 6476(2)   | 2617(2)    | 6583(2)    | 16.8(9)   |
| C98  | 6322(2)   | 3367(2)    | 6395(2)    | 19.3(10)  |
| C99  | 5761(2)   | 3490(3)    | 5970(2)    | 24.5(11)  |
| C100 | 5370(3)   | 2907(3)    | 5737(3)    | 29.0(12)  |
| C101 | 5507(3)   | 2178(3)    | 5931(3)    | 28.8(12)  |
| C102 | 6061(2)   | 2018(3)    | 6355(2)    | 22.7(10)  |
| C103 | 6715(3)   | 4016(2)    | 6684(2)    | 23.6(11)  |
| C104 | 6805(3)   | 4709(3)    | 6194(2)    | 27.8(11)  |
| C105 | 6294(3)   | 4236(3)    | 7407(2)    | 29.7(12)  |
| C106 | 6147(3)   | 1217(2)    | 6621(2)    | 26.1(11)  |
| C107 | 5995(3)   | 616(3)     | 6093(3)    | 45.3(15)  |
| C108 | 5626(3)   | 1089(3)    | 7322(3)    | 36.6(13)  |
| C109 | 7471(3)   | 2936(2)    | 3463(2)    | 20.0(10)  |
| C110 | 6859(2)   | 3232(2)    | 3159(2)    | 17.3(10)  |
| C111 | 6966(3)   | 3418(2)    | 2445(2)    | 20.2(10)  |
| C112 | 7648(2)   | 3297(2)    | 2025(2)    | 18.9(10)  |
| C113 | 8245(2)   | 2979(2)    | 2314(2)    | 20.7(10)  |
| C114 | 8170(2)   | 2801(2)    | 3025(2)    | 18.1(10)  |
| C115 | 6069(2)   | 3317(2)    | 3569(2)    | 18.2(10)  |
| C116 | 5598(3)   | 2675(3)    | 3678(2)    | 24.5(11)  |
| C117 | 4856(3)   | 2765(3)    | 4003(2)    | 26.3(11)  |
| C118 | 4580(3)   | 3461(3)    | 4213(2)    | 27.9(11)  |
| C119 | 5047(2)   | 4076(3)    | 4113(2)    | 23.9(11)  |
| C120 | 5799(2)   | 4019(3)    | 3791(2)    | 20.8(10)  |
| C121 | 5859(3)   | 1919(3)    | 3391(3)    | 28.9(12)  |
| C122 | 5601(3)   | 1261(3)    | 3883(3)    | 52.1(17)  |
| C123 | 5609(3)   | 1830(3)    | 2663(3)    | 39.0(14)  |

| Atom | x        | y          | z          | U(eq)    |
|------|----------|------------|------------|----------|
| C124 | 6275(3)  | 4727(3)    | 3639(2)    | 22.5(10) |
| C125 | 6255(3)  | 5219(3)    | 4288(2)    | 31.2(12) |
| C126 | 6004(3)  | 5182(3)    | 3039(2)    | 26.7(11) |
| C127 | 8789(2)  | 2412(2)    | 3346(2)    | 20.1(10) |
| C128 | 9412(3)  | 2812(3)    | 3514(2)    | 23.8(11) |
| C129 | 9924(3)  | 2434(3)    | 3890(3)    | 30.6(12) |
| C130 | 9828(3)  | 1690(3)    | 4074(3)    | 36.8(13) |
| C131 | 9239(3)  | 1286(3)    | 3865(2)    | 28.9(12) |
| C132 | 8713(2)  | 1629(3)    | 3494(2)    | 21.3(10) |
| C133 | 9559(3)  | 3622(3)    | 3292(3)    | 28.1(12) |
| C134 | 9943(3)  | 4074(3)    | 3809(3)    | 41.6(15) |
| C135 | 10040(3) | 3686(3)    | 2556(3)    | 33.4(12) |
| C136 | 8100(3)  | 1172(2)    | 3222(3)    | 25.5(11) |
| C137 | 7863(3)  | 471(3)     | 3672(3)    | 40.4(14) |
| C138 | 8355(3)  | 957(3)     | 2457(3)    | 30.3(12) |
| C141 | 8124(3)  | 2498(3)    | 140(3)     | 49.6(16) |
| C142 | 7297(3)  | 2416(3)    | 337(3)     | 50.3(16) |
| O142 | 7023(2)  | 1872.5(19) | -83.0(18)  | 34.8(9)  |
| C143 | 6220(3)  | 1797(3)    | 40(3)      | 50.2(16) |
| C144 | 5986(3)  | 1211(3)    | -432(3)    | 44.7(15) |
| C151 | 3739(3)  | 975(3)     | 5449(3)    | 54.0(17) |
| C152 | 3138(3)  | 1194(3)    | 5026(3)    | 40.5(14) |
| O152 | 2992(2)  | 1975(2)    | 5125.2(19) | 44.0(10) |
| C153 | 2429(4)  | 2243(3)    | 4756(3)    | 55.2(17) |
| C154 | 2271(3)  | 3050(3)    | 4956(3)    | 45.4(15) |

**Table 3 Anisotropic Displacement Parameters ( $\text{\AA}^2 \times 10^3$ ) for WZ13FMI. The Anisotropic displacement factor exponent takes the form:**

$$-2\pi^2[h^2a^{*2}U_{11}+2hka^*b^*U_{12}+\dots].$$

| Atom | U <sub>11</sub> | U <sub>22</sub> | U <sub>33</sub> | U <sub>23</sub> | U <sub>13</sub> | U <sub>12</sub> |
|------|-----------------|-----------------|-----------------|-----------------|-----------------|-----------------|
| Sn1  | 15.17(17)       | 23.79(19)       | 17.65(18)       | -2.53(14)       | -3.72(13)       | 1.23(14)        |
| C2   | 10(2)           | 15(2)           | 25(3)           | 3(2)            | -8(2)           | -1.9(19)        |
| C1   | 15.1(19)        | 14.4(19)        | 18(2)           | 1.6(16)         | -0.5(16)        | -2.7(16)        |
| C3   | 19(2)           | 16.2(19)        | 19(2)           | -0.8(17)        | -2.8(17)        | 0.0(16)         |
| C4   | 20(2)           | 18(2)           | 19(2)           | -2.3(17)        | 0.1(17)         | -0.7(17)        |
| C5   | 19(2)           | 16(2)           | 23(2)           | 0.3(17)         | -4.8(17)        | 0.5(17)         |
| C6   | 21(2)           | 21(2)           | 26(2)           | 2.0(18)         | -2.0(18)        | 2.0(17)         |
| C7   | 24(2)           | 21(2)           | 22(2)           | -1.7(18)        | -5.1(18)        | 1.7(17)         |
| C8   | 19(2)           | 26(2)           | 19(2)           | 3.0(17)         | -3.7(17)        | 3.1(18)         |
| Sn1B | 21(3)           | 25(3)           | 25(3)           | -1(2)           | -2(2)           | 2(2)            |
| C9   | 11(2)           | 21(2)           | 17(2)           | -1.3(19)        | -1.5(18)        | 0.5(18)         |
| C10  | 10(2)           | 16(2)           | 24(2)           | -1.8(19)        | -3.8(18)        | 2.3(17)         |
| C11  | 19(2)           | 16(2)           | 26(3)           | -4(2)           | -5(2)           | 1.5(19)         |
| C12  | 25(3)           | 26(3)           | 15(2)           | -5(2)           | -3(2)           | 2(2)            |
| C13  | 17(2)           | 16(2)           | 22(2)           | 2.4(19)         | -0.6(19)        | -1.7(18)        |
| C14  | 13(2)           | 16(2)           | 24(3)           | -3.8(19)        | -6.6(19)        | 0.7(18)         |
| C15  | 21(2)           | 18(2)           | 17(2)           | -1.8(18)        | -7.6(19)        | -4.3(19)        |
| C16  | 22(3)           | 23(3)           | 20(2)           | -6(2)           | -4(2)           | -4(2)           |
| C17  | 23(3)           | 27(3)           | 28(3)           | -1(2)           | -2(2)           | -5(2)           |
| C18  | 35(3)           | 28(3)           | 20(3)           | 5(2)            | -6(2)           | -12(2)          |
| C19  | 33(3)           | 21(3)           | 26(3)           | 1(2)            | -13(2)          | -3(2)           |
| C20  | 25(3)           | 20(2)           | 23(3)           | -2(2)           | -11(2)          | -2(2)           |
| C21  | 22(3)           | 19(2)           | 30(3)           | -2(2)           | -1(2)           | -5(2)           |
| C22  | 25(3)           | 35(3)           | 49(4)           | -8(3)           | -1(2)           | 2(2)            |
| C23  | 36(3)           | 36(3)           | 39(3)           | -8(2)           | -17(3)          | 9(2)            |
| C24  | 28(3)           | 15(2)           | 40(3)           | 5(2)            | -11(2)          | -3(2)           |
| C25  | 31(3)           | 26(3)           | 58(4)           | 8(3)            | -22(3)          | -2(2)           |
| C26  | 23(3)           | 34(3)           | 50(4)           | -6(3)           | -4(2)           | 2(2)            |
| C27  | 18(2)           | 18(2)           | 18(2)           | -1.7(19)        | 0.3(19)         | -4.3(19)        |
| C28  | 22(2)           | 18(2)           | 20(2)           | 1.9(19)         | -2.7(19)        | -5.7(19)        |
| C29  | 32(3)           | 23(3)           | 26(3)           | -4(2)           | -6(2)           | -8(2)           |
| C30  | 36(3)           | 24(3)           | 34(3)           | -12(2)          | 0(2)            | 2(2)            |
| C31  | 24(3)           | 23(3)           | 43(3)           | -7(2)           | 3(2)            | 5(2)            |
| C32  | 24(3)           | 16(2)           | 30(3)           | -5(2)           | -1(2)           | -1(2)           |
| C33  | 22(3)           | 16(2)           | 34(3)           | 0(2)            | -11(2)          | -5.7(19)        |
| C34  | 28(3)           | 27(3)           | 43(3)           | 9(2)            | -18(2)          | -10(2)          |
| C35  | 22(3)           | 23(3)           | 38(3)           | -5(2)           | -6(2)           | 0(2)            |
| C36  | 19(3)           | 25(3)           | 39(3)           | -10(2)          | -7(2)           | 3(2)            |
| C37  | 24(3)           | 46(3)           | 50(4)           | -3(3)           | -4(3)           | 1(3)            |
| C38  | 28(3)           | 34(3)           | 44(3)           | 2(3)            | -14(2)          | -3(2)           |
| C39  | 8(2)            | 18(2)           | 17(2)           | -0.9(18)        | -1.1(17)        | 5.5(17)         |
| C40  | 12(2)           | 18(2)           | 17(2)           | 0.6(18)         | -1.5(18)        | 1.9(18)         |
| C41  | 18(2)           | 17(2)           | 21(2)           | 6.5(19)         | -5.8(19)        | -0.2(19)        |
| C42  | 26(3)           | 23(3)           | 20(2)           | -1(2)           | -6(2)           | 1(2)            |
| C43  | 20(2)           | 19(2)           | 23(3)           | -4.4(19)        | -6(2)           | 0.3(19)         |
| C44  | 14(2)           | 17(2)           | 23(2)           | 1.1(19)         | -6.1(19)        | 1.9(18)         |
| C45  | 21(2)           | 18(2)           | 15(2)           | 1.2(18)         | -2.8(19)        | -4.9(19)        |
| C46  | 21(2)           | 18(2)           | 18(2)           | -0.7(19)        | 0.2(19)         | -3.4(19)        |
| C47  | 27(3)           | 13(2)           | 27(3)           | 0.7(19)         | -3(2)           | -2.8(19)        |
| C48  | 30(3)           | 24(3)           | 29(3)           | -4(2)           | -6(2)           | -8(2)           |
| C49  | 20(3)           | 27(3)           | 32(3)           | 2(2)            | -7(2)           | -5(2)           |
| C50  | 17(2)           | 23(2)           | 17(2)           | 1.6(19)         | -0.6(19)        | -2.5(19)        |
| C51  | 16(2)           | 15(2)           | 29(3)           | -0.2(19)        | -1(2)           | -2.0(18)        |
| C52  | 25(3)           | 28(3)           | 34(3)           | 0(2)            | -2(2)           | 2(2)            |
| C53  | 26(3)           | 30(3)           | 27(3)           | 2(2)            | -9(2)           | 0(2)            |
| C54  | 21(3)           | 20(3)           | 32(3)           | 3(2)            | -5(2)           | -2(2)           |
| C55  | 20(3)           | 35(3)           | 42(3)           | 3(2)            | -6(2)           | 3(2)            |
| C56  | 27(3)           | 28(3)           | 36(3)           | 3(2)            | -2(2)           | 5(2)            |
| C57  | 19(2)           | 16(2)           | 14(2)           | -1.3(18)        | -6.8(18)        | -0.6(18)        |
| C58  | 21(2)           | 17(2)           | 23(3)           | -3.3(19)        | -5(2)           | 0.7(19)         |
| C59  | 30(3)           | 14(2)           | 32(3)           | 1(2)            | -10(2)          | 2(2)            |
| C60  | 38(3)           | 17(2)           | 28(3)           | 1(2)            | -7(2)           | -3(2)           |
| C61  | 21(3)           | 20(2)           | 29(3)           | -1(2)           | -2(2)           | -5(2)           |
| C62  | 21(2)           | 15(2)           | 15(2)           | -4.9(18)        | -3.4(18)        | -1.2(18)        |
| C63  | 27(3)           | 16(2)           | 42(3)           | -2(2)           | -9(2)           | -2(2)           |
| C64  | 30(3)           | 49(4)           | 71(4)           | 19(3)           | -28(3)          | -4(3)           |
| C65  | 27(3)           | 33(3)           | 77(5)           | -19(3)          | 11(3)           | -6(2)           |
| C66  | 20(2)           | 16(2)           | 25(3)           | 0.1(19)         | -3(2)           | -2.1(19)        |
| C67  | 23(3)           | 28(3)           | 30(3)           | -4(2)           | -3(2)           | -4(2)           |

| Atom | U <sub>11</sub> | U <sub>22</sub> | U <sub>33</sub> | U <sub>23</sub> | U <sub>13</sub> | U <sub>12</sub> |
|------|-----------------|-----------------|-----------------|-----------------|-----------------|-----------------|
| C68  | 23(3)           | 25(3)           | 30(3)           | 0(2)            | -12(2)          | 1(2)            |
| Sn71 | 22.4(2)         | 12.5(2)         | 16.4(2)         | 0.38(17)        | -5.50(18)       | 0.78(17)        |
| C71  | 18.2(19)        | 12.3(19)        | 22.0(19)        | 3.6(17)         | -1.8(17)        | -0.4(17)        |
| C72  | 15(2)           | 15(2)           | 16(2)           | 0.3(19)         | -3.4(19)        | 3.1(19)         |
| C73  | 16(2)           | 17(2)           | 15(2)           | 1.5(19)         | -1.1(18)        | 0.8(17)         |
| C74  | 17(2)           | 18(2)           | 16(3)           | 1(2)            | -6(2)           | -2(2)           |
| C75  | 25(4)           | 18(3)           | 20(4)           | 4(3)            | -2(3)           | 3(3)            |
| C76  | 19(4)           | 19(3)           | 27(4)           | -4(2)           | -2(3)           | -8(2)           |
| C77  | 25(3)           | 23(3)           | 24(5)           | -2(3)           | -10(3)          | -3(3)           |
| C78  | 33(3)           | 14(3)           | 14(4)           | 1(3)            | 3(4)            | 3(2)            |
| Sn72 | 20.8(6)         | 20.6(7)         | 21.0(7)         | -0.4(5)         | -6.2(5)         | -2.5(5)         |
| C73B | 17(3)           | 16(3)           | 17(3)           | 2(2)            | -2(2)           | 1(2)            |
| C74B | 17(2)           | 18(3)           | 16(3)           | 1(2)            | -6(2)           | -1(2)           |
| C75B | 26(5)           | 20(4)           | 19(5)           | 5(4)            | -1(4)           | 5(4)            |
| C76B | 20(5)           | 20(3)           | 27(4)           | -5(3)           | -2(4)           | -7(3)           |
| C77B | 25(4)           | 22(4)           | 26(5)           | 0(4)            | -9(4)           | -1(4)           |
| C78B | 33(4)           | 15(4)           | 14(5)           | 1(4)            | 3(5)            | 2(3)            |
| C79  | 20(2)           | 19(2)           | 19(2)           | -4.1(19)        | -4.6(19)        | 0.3(19)         |
| C80  | 16(2)           | 20(2)           | 18(2)           | -1.3(19)        | -4.0(18)        | 0.5(19)         |
| C81  | 22(3)           | 31(3)           | 23(3)           | 1(2)            | -12(2)          | 7(2)            |
| C82  | 27(3)           | 36(3)           | 17(2)           | -3(2)           | -7(2)           | 3(2)            |
| C83  | 17(2)           | 24(3)           | 23(3)           | -5(2)           | -4.2(19)        | 2.8(19)         |
| C84  | 20(2)           | 18(2)           | 20(2)           | -4.4(19)        | -5.8(19)        | 2.7(19)         |
| C85  | 16(2)           | 24(2)           | 16(2)           | 0.5(19)         | -7.1(18)        | 5.3(19)         |
| C86  | 22(2)           | 24(3)           | 15(2)           | -3.4(19)        | -8.4(19)        | 8(2)            |
| C87  | 26(3)           | 24(3)           | 22(3)           | 1(2)            | -4(2)           | 11(2)           |
| C88  | 22(3)           | 33(3)           | 24(3)           | 4(2)            | 3(2)            | 12(2)           |
| C89  | 20(3)           | 29(3)           | 27(3)           | 6(2)            | 1(2)            | 2(2)            |
| C90  | 20(2)           | 18(2)           | 21(2)           | 4.6(19)         | -4.7(19)        | 5.6(19)         |
| C91  | 24(3)           | 28(3)           | 32(3)           | -10(2)          | -11(2)          | 4(2)            |
| C92  | 39(3)           | 66(4)           | 55(4)           | -35(3)          | -15(3)          | -1(3)           |
| C93  | 36(3)           | 31(3)           | 54(4)           | 6(3)            | -17(3)          | -9(2)           |
| C94  | 18(2)           | 21(2)           | 34(3)           | 4(2)            | -4(2)           | 2.5(19)         |
| C95  | 24(3)           | 25(3)           | 52(4)           | 10(2)           | -6(2)           | -2(2)           |
| C96  | 36(3)           | 27(3)           | 40(3)           | -5(2)           | -11(2)          | 0(2)            |
| C97  | 11(2)           | 25(2)           | 14(2)           | 0.2(19)         | -1.3(18)        | -2.6(18)        |
| C98  | 14(2)           | 24(3)           | 20(2)           | 1.5(19)         | -2.8(19)        | 1.3(19)         |
| C99  | 22(3)           | 24(3)           | 28(3)           | 6(2)            | -8(2)           | 3(2)            |
| C100 | 25(3)           | 31(3)           | 34(3)           | 2(2)            | -16(2)          | 2(2)            |
| C101 | 24(3)           | 29(3)           | 36(3)           | -4(2)           | -14(2)          | -1(2)           |
| C102 | 18(2)           | 26(3)           | 24(3)           | -4(2)           | -3(2)           | 4(2)            |
| C103 | 24(3)           | 19(2)           | 30(3)           | 4(2)            | -10(2)          | -3(2)           |
| C104 | 31(3)           | 24(3)           | 30(3)           | 4(2)            | -10(2)          | -4(2)           |
| C105 | 27(3)           | 30(3)           | 32(3)           | -6(2)           | -7(2)           | -7(2)           |
| C106 | 25(3)           | 21(3)           | 34(3)           | -2(2)           | -8(2)           | 2(2)            |
| C107 | 53(4)           | 27(3)           | 61(4)           | -10(3)          | -26(3)          | 6(3)            |
| C108 | 29(3)           | 23(3)           | 57(4)           | 9(3)            | -3(3)           | -1(2)           |
| C109 | 22(3)           | 19(2)           | 19(2)           | 0.9(19)         | -2(2)           | 2.9(19)         |
| C110 | 14(2)           | 20(2)           | 17(2)           | 2.8(19)         | 1.8(18)         | -3.8(18)        |
| C111 | 27(3)           | 13(2)           | 23(3)           | 0.5(19)         | -10(2)          | 5.3(19)         |
| C112 | 22(3)           | 18(2)           | 17(2)           | 1.6(19)         | -4.9(19)        | -1.4(19)        |
| C113 | 16(2)           | 18(2)           | 27(3)           | -3(2)           | 1(2)            | -0.2(19)        |
| C114 | 17(2)           | 15(2)           | 22(3)           | 0.7(19)         | -2.5(19)        | 0.1(18)         |
| C115 | 11(2)           | 26(3)           | 18(2)           | 1.7(19)         | -2.0(18)        | 12.4(19)        |
| C116 | 24(3)           | 27(3)           | 23(3)           | 6(2)            | -8(2)           | 3(2)            |
| C117 | 23(3)           | 30(3)           | 27(3)           | 9(2)            | -6(2)           | -3(2)           |
| C118 | 19(3)           | 38(3)           | 26(3)           | 4(2)            | 0(2)            | 2(2)            |
| C119 | 21(3)           | 27(3)           | 23(3)           | -2(2)           | -4(2)           | 6(2)            |
| C120 | 21(2)           | 30(3)           | 12(2)           | 0.1(19)         | -6.1(19)        | 7(2)            |
| C121 | 26(3)           | 21(3)           | 41(3)           | 3(2)            | -7(2)           | 5(2)            |
| C122 | 46(4)           | 28(3)           | 78(5)           | 12(3)           | 3(3)            | 4(3)            |
| C123 | 34(3)           | 26(3)           | 60(4)           | -12(3)          | -13(3)          | 7(2)            |
| C124 | 19(2)           | 28(3)           | 21(3)           | 0(2)            | -3.5(19)        | 4(2)            |
| C125 | 32(3)           | 34(3)           | 28(3)           | -11(2)          | -3(2)           | 4(2)            |
| C126 | 25(3)           | 27(3)           | 28(3)           | 0(2)            | -2(2)           | 0(2)            |
| C127 | 20(2)           | 23(3)           | 16(2)           | 0.9(19)         | -2.5(19)        | 9(2)            |
| C128 | 25(3)           | 25(3)           | 23(3)           | -8(2)           | -6(2)           | 9(2)            |
| C129 | 34(3)           | 28(3)           | 35(3)           | -10(2)          | -20(2)          | 8(2)            |
| C130 | 39(3)           | 38(3)           | 38(3)           | -4(3)           | -20(3)          | 16(3)           |
| C131 | 34(3)           | 24(3)           | 30(3)           | 3(2)            | -7(2)           | 10(2)           |
| C132 | 21(2)           | 23(3)           | 18(2)           | 1(2)            | 1.2(19)         | 8(2)            |
| C133 | 23(3)           | 24(3)           | 42(3)           | -11(2)          | -18(2)          | 5(2)            |

| Atom | U <sub>11</sub> | U <sub>22</sub> | U <sub>33</sub> | U <sub>23</sub> | U <sub>13</sub> | U <sub>12</sub> |
|------|-----------------|-----------------|-----------------|-----------------|-----------------|-----------------|
| C134 | 28(3)           | 31(3)           | 71(4)           | -18(3)          | -22(3)          | 6(2)            |
| C135 | 28(3)           | 30(3)           | 44(3)           | -1(2)           | -12(2)          | -5(2)           |
| C136 | 19(3)           | 19(2)           | 38(3)           | 8(2)            | -2(2)           | 1(2)            |
| C137 | 40(3)           | 31(3)           | 49(4)           | 11(3)           | -3(3)           | -5(3)           |
| C138 | 27(3)           | 24(3)           | 41(3)           | -5(2)           | -9(2)           | -3(2)           |
| C141 | 50(4)           | 40(4)           | 55(4)           | -7(3)           | 5(3)            | -5(3)           |
| C142 | 54(4)           | 51(4)           | 43(4)           | -21(3)          | 6(3)            | -7(3)           |
| O142 | 38(2)           | 32(2)           | 33(2)           | -5.5(16)        | -1.0(17)        | 4.2(16)         |
| C143 | 41(4)           | 51(4)           | 56(4)           | -18(3)          | 3(3)            | 2(3)            |
| C144 | 43(4)           | 44(4)           | 49(4)           | -5(3)           | -14(3)          | 10(3)           |
| C151 | 49(4)           | 55(4)           | 62(4)           | 2(3)            | -23(3)          | 3(3)            |
| C152 | 49(4)           | 31(3)           | 44(3)           | -8(3)           | -14(3)          | -6(3)           |
| O152 | 58(3)           | 40(2)           | 37(2)           | -4.7(18)        | -15.3(19)       | 3.4(19)         |
| C153 | 68(5)           | 57(4)           | 42(4)           | -6(3)           | -13(3)          | 25(3)           |
| C154 | 50(4)           | 42(3)           | 43(4)           | 10(3)           | -1(3)           | 11(3)           |



**Table 4 Bond Lengths for WZ13FMI.**

| Atom | Atom | Length/Å  | Atom | Atom | Length/Å  |
|------|------|-----------|------|------|-----------|
| Sn1  | C1   | 2.225(4)  | C72  | C73  | 1.507(5)  |
| Sn1  | C9   | 2.217(4)  | C73  | C74  | 1.3900    |
| C2   | C1   | 1.332(6)  | C73  | C78  | 1.3900    |
| C2   | C39  | 1.492(6)  | C74  | C75  | 1.3900    |
| C1   | C3   | 1.512(5)  | C75  | C76  | 1.3900    |
| C3   | C4   | 1.3900    | C76  | C77  | 1.3900    |
| C3   | C8   | 1.3900    | C77  | C78  | 1.3900    |
| C4   | C5   | 1.3900    | Sn72 | C72B | 2.158(14) |
| C5   | C6   | 1.3900    | Sn72 | C109 | 2.285(5)  |
| C6   | C7   | 1.3900    | C71B | C72B | 1.41(2)   |
| C7   | C8   | 1.3900    | C71B | C79  | 1.48(2)   |
| Sn1B | C2B  | 2.22(2)   | C72B | C73B | 1.508(7)  |
| Sn1B | C39  | 2.257(10) | C73B | C74B | 1.3900    |
| C1B  | C2B  | 1.33(2)   | C73B | C78B | 1.3900    |
| C1B  | C9   | 1.54(5)   | C74B | C75B | 1.3900    |
| C2B  | C3B  | 1.513(17) | C75B | C76B | 1.3900    |
| C3B  | C4B  | 1.3900    | C76B | C77B | 1.3900    |
| C3B  | C8B  | 1.3900    | C77B | C78B | 1.3900    |
| C4B  | C5B  | 1.3900    | C79  | C80  | 1.405(6)  |
| C5B  | C6B  | 1.3900    | C79  | C84  | 1.407(6)  |
| C6B  | C7B  | 1.3900    | C80  | C81  | 1.406(6)  |
| C7B  | C8B  | 1.3900    | C80  | C85  | 1.501(6)  |
| C9   | C10  | 1.411(6)  | C81  | C82  | 1.388(6)  |
| C9   | C14  | 1.396(6)  | C82  | C83  | 1.383(6)  |
| C10  | C11  | 1.389(6)  | C83  | C84  | 1.393(6)  |
| C10  | C15  | 1.524(6)  | C84  | C97  | 1.506(6)  |
| C11  | C12  | 1.390(6)  | C85  | C86  | 1.419(6)  |
| C12  | C13  | 1.384(6)  | C85  | C90  | 1.414(6)  |
| C13  | C14  | 1.380(6)  | C86  | C87  | 1.388(6)  |
| C14  | C27  | 1.519(6)  | C86  | C91  | 1.522(6)  |
| C15  | C16  | 1.411(6)  | C87  | C88  | 1.386(6)  |
| C15  | C20  | 1.413(6)  | C88  | C89  | 1.379(6)  |
| C16  | C17  | 1.398(6)  | C89  | C90  | 1.393(6)  |
| C16  | C21  | 1.519(6)  | C90  | C94  | 1.525(6)  |
| C17  | C18  | 1.379(6)  | C91  | C92  | 1.533(7)  |
| C18  | C19  | 1.381(7)  | C91  | C93  | 1.526(7)  |
| C19  | C20  | 1.399(6)  | C94  | C95  | 1.541(6)  |
| C20  | C24  | 1.526(6)  | C94  | C96  | 1.543(6)  |
| C21  | C22  | 1.533(6)  | C97  | C98  | 1.418(6)  |
| C21  | C23  | 1.531(6)  | C97  | C102 | 1.414(6)  |
| C24  | C25  | 1.538(6)  | C98  | C99  | 1.397(6)  |
| C24  | C26  | 1.539(7)  | C98  | C103 | 1.511(6)  |
| C27  | C28  | 1.403(6)  | C99  | C100 | 1.374(6)  |
| C27  | C32  | 1.417(6)  | C100 | C101 | 1.378(6)  |
| C28  | C29  | 1.401(6)  | C101 | C102 | 1.398(6)  |
| C28  | C33  | 1.513(6)  | C102 | C106 | 1.526(6)  |
| C29  | C30  | 1.385(7)  | C103 | C104 | 1.535(6)  |
| C30  | C31  | 1.374(7)  | C103 | C105 | 1.537(6)  |
| C31  | C32  | 1.394(6)  | C106 | C107 | 1.542(7)  |
| C32  | C36  | 1.521(6)  | C106 | C108 | 1.536(7)  |
| C33  | C34  | 1.540(6)  | C109 | C110 | 1.409(6)  |
| C33  | C35  | 1.529(6)  | C109 | C114 | 1.421(6)  |
| C36  | C37  | 1.537(6)  | C110 | C111 | 1.394(6)  |
| C36  | C38  | 1.549(7)  | C110 | C115 | 1.520(6)  |
| C39  | C40  | 1.413(6)  | C111 | C112 | 1.377(6)  |
| C39  | C44  | 1.402(6)  | C112 | C113 | 1.388(6)  |
| C40  | C41  | 1.388(6)  | C113 | C114 | 1.385(6)  |
| C40  | C45  | 1.515(6)  | C114 | C127 | 1.507(6)  |
| C41  | C42  | 1.379(6)  | C115 | C116 | 1.417(6)  |
| C42  | C43  | 1.388(6)  | C115 | C120 | 1.394(6)  |
| C43  | C44  | 1.402(6)  | C116 | C117 | 1.388(6)  |
| C44  | C57  | 1.494(6)  | C116 | C121 | 1.514(6)  |
| C45  | C46  | 1.404(6)  | C117 | C118 | 1.382(7)  |
| C45  | C50  | 1.413(6)  | C118 | C119 | 1.373(6)  |
| C46  | C47  | 1.393(6)  | C119 | C120 | 1.397(6)  |
| C46  | C51  | 1.522(6)  | C120 | C124 | 1.524(6)  |
| C47  | C48  | 1.386(6)  | C121 | C122 | 1.523(7)  |
| C48  | C49  | 1.381(6)  | C121 | C123 | 1.541(7)  |
| C49  | C50  | 1.386(6)  | C124 | C125 | 1.536(6)  |
| C50  | C54  | 1.533(6)  | C124 | C126 | 1.534(6)  |
| C51  | C52  | 1.534(6)  | C127 | C128 | 1.401(6)  |

| Atom | Atom | Length/Å |
|------|------|----------|
| C51  | C53  | 1.536(6) |
| C54  | C55  | 1.528(6) |
| C54  | C56  | 1.517(6) |
| C57  | C58  | 1.411(6) |
| C57  | C62  | 1.419(6) |
| C58  | C59  | 1.390(6) |
| C58  | C63  | 1.526(6) |
| C59  | C60  | 1.375(6) |
| C60  | C61  | 1.373(6) |
| C61  | C62  | 1.391(6) |
| C62  | C66  | 1.523(6) |
| C63  | C64  | 1.526(7) |
| C63  | C65  | 1.518(7) |
| C66  | C67  | 1.534(6) |
| C66  | C68  | 1.523(6) |
| Sn71 | C72  | 2.223(5) |
| Sn71 | C79  | 2.237(4) |
| C71  | C72  | 1.337(8) |
| C71  | C109 | 1.481(7) |

| Atom | Atom | Length/Å |
|------|------|----------|
| C127 | C132 | 1.425(6) |
| C128 | C129 | 1.410(6) |
| C128 | C133 | 1.513(6) |
| C129 | C130 | 1.374(7) |
| C130 | C131 | 1.387(7) |
| C131 | C132 | 1.395(6) |
| C132 | C136 | 1.523(6) |
| C133 | C134 | 1.530(6) |
| C133 | C135 | 1.547(7) |
| C136 | C137 | 1.532(6) |
| C136 | C138 | 1.530(7) |
| C141 | C142 | 1.476(7) |
| C142 | O142 | 1.407(6) |
| O142 | C143 | 1.424(6) |
| C143 | C144 | 1.497(7) |
| C151 | C152 | 1.485(7) |
| C152 | O152 | 1.430(6) |
| O152 | C153 | 1.393(6) |
| C153 | C154 | 1.514(8) |

**Table 5 Bond Angles for WZ13FMI.**

| Atom Atom Atom | Angle <sup>o</sup> | Atom Atom Atom | Angle <sup>o</sup> |
|----------------|--------------------|----------------|--------------------|
| C9 Sn1 C1      | 110.22 (15)        | C71 C72 C73    | 126.8 (5)          |
| C1 C2 C39      | 135.5 (4)          | C73 C72 Sn71   | 127.4 (3)          |
| C2 C1 Sn1      | 104.3 (3)          | C74 C73 C72    | 120.3 (3)          |
| C2 C1 C3       | 125.9 (4)          | C74 C73 C78    | 120.0              |
| C3 C1 Sn1      | 129.5 (3)          | C78 C73 C72    | 119.5 (3)          |
| C4 C3 C1       | 120.2 (2)          | C73 C74 C75    | 120.0              |
| C4 C3 C8       | 120.0              | C74 C75 C76    | 120.0              |
| C8 C3 C1       | 119.4 (2)          | C77 C76 C75    | 120.0              |
| C5 C4 C3       | 120.0              | C76 C77 C78    | 120.0              |
| C4 C5 C6       | 120.0              | C77 C78 C73    | 120.0              |
| C7 C6 C5       | 120.0              | C72B Sn72 C109 | 105.7 (3)          |
| C6 C7 C8       | 120.0              | C72B C71B C79  | 144.6 (18)         |
| C7 C8 C3       | 120.0              | C71B C72B Sn72 | 108.1 (11)         |
| C2B Sn1B C39   | 105.2 (11)         | C71B C72B C73B | 122.5 (13)         |
| C2B C1B C9     | 142 (6)            | C73B C72B Sn72 | 128.7 (7)          |
| C1B C2B Sn1B   | 107 (2)            | C74B C73B C72B | 120.1 (4)          |
| C1B C2B C3B    | 128 (3)            | C74B C73B C78B | 120.0              |
| C3B C2B Sn1B   | 122 (2)            | C78B C73B C72B | 119.8 (4)          |
| C4B C3B C2B    | 119 (2)            | C73B C74B C75B | 120.0              |
| C4B C3B C8B    | 120.0              | C74B C75B C76B | 120.0              |
| C8B C3B C2B    | 120 (2)            | C77B C76B C75B | 120.0              |
| C3B C4B C5B    | 120.0              | C78B C77B C76B | 120.0              |
| C6B C5B C4B    | 120.0              | C77B C78B C73B | 120.0              |
| C5B C6B C7B    | 120.0              | C80 C79 Sn71   | 127.1 (3)          |
| C8B C7B C6B    | 120.0              | C80 C79 C71B   | 124.1 (8)          |
| C7B C8B C3B    | 120.0              | C80 C79 C84    | 119.2 (4)          |
| C10 C9 Sn1     | 129.2 (3)          | C84 C79 Sn71   | 109.1 (3)          |
| C10 C9 C1B     | 118 (3)            | C84 C79 C71B   | 116.8 (8)          |
| C14 C9 Sn1     | 110.0 (3)          | C79 C80 C81    | 119.1 (4)          |
| C14 C9 C1B     | 123 (3)            | C79 C80 C85    | 121.7 (4)          |
| C14 C9 C10     | 118.8 (4)          | C81 C80 C85    | 119.1 (4)          |
| C9 C10 C15     | 120.9 (4)          | C82 C81 C80    | 121.1 (4)          |
| C11 C10 C9     | 119.1 (4)          | C83 C82 C81    | 119.7 (4)          |
| C11 C10 C15    | 119.7 (4)          | C82 C83 C84    | 120.3 (4)          |
| C10 C11 C12    | 121.3 (4)          | C79 C84 C97    | 116.6 (4)          |
| C13 C12 C11    | 119.4 (4)          | C83 C84 C79    | 120.6 (4)          |
| C14 C13 C12    | 120.2 (4)          | C83 C84 C97    | 122.7 (4)          |
| C9 C14 C27     | 117.0 (4)          | C86 C85 C80    | 119.5 (4)          |
| C13 C14 C9     | 121.1 (4)          | C90 C85 C80    | 120.6 (4)          |
| C13 C14 C27    | 121.8 (4)          | C90 C85 C86    | 119.9 (4)          |
| C16 C15 C10    | 118.6 (4)          | C85 C86 C91    | 122.0 (4)          |
| C16 C15 C20    | 120.4 (4)          | C87 C86 C85    | 118.6 (4)          |
| C20 C15 C10    | 120.9 (4)          | C87 C86 C91    | 119.2 (4)          |
| C15 C16 C21    | 122.0 (4)          | C88 C87 C86    | 121.6 (4)          |
| C17 C16 C15    | 119.0 (4)          | C89 C88 C87    | 119.7 (4)          |
| C17 C16 C21    | 118.7 (4)          | C88 C89 C90    | 121.2 (4)          |
| C18 C17 C16    | 120.5 (4)          | C85 C90 C94    | 121.8 (4)          |
| C17 C18 C19    | 120.6 (4)          | C89 C90 C85    | 119.0 (4)          |
| C18 C19 C20    | 121.0 (4)          | C89 C90 C94    | 119.2 (4)          |
| C15 C20 C24    | 122.7 (4)          | C86 C91 C92    | 113.2 (4)          |
| C19 C20 C15    | 118.4 (4)          | C86 C91 C93    | 109.1 (4)          |
| C19 C20 C24    | 118.9 (4)          | C93 C91 C92    | 110.1 (4)          |
| C16 C21 C22    | 114.3 (4)          | C90 C94 C95    | 112.4 (4)          |
| C16 C21 C23    | 110.2 (4)          | C90 C94 C96    | 111.0 (4)          |
| C23 C21 C22    | 109.9 (4)          | C95 C94 C96    | 109.1 (4)          |
| C20 C24 C25    | 112.3 (4)          | C98 C97 C84    | 120.4 (4)          |
| C20 C24 C26    | 111.5 (4)          | C102 C97 C84   | 118.9 (4)          |
| C25 C24 C26    | 109.7 (4)          | C102 C97 C98   | 120.6 (4)          |
| C28 C27 C14    | 121.1 (4)          | C97 C98 C103   | 121.2 (4)          |
| C28 C27 C32    | 119.9 (4)          | C99 C98 C97    | 117.9 (4)          |
| C32 C27 C14    | 119.1 (4)          | C99 C98 C103   | 120.8 (4)          |
| C27 C28 C33    | 121.0 (4)          | C100 C99 C98   | 121.4 (4)          |
| C29 C28 C27    | 118.6 (4)          | C99 C100 C101  | 120.8 (4)          |
| C29 C28 C33    | 120.3 (4)          | C100 C101 C102 | 120.5 (4)          |
| C30 C29 C28    | 121.4 (4)          | C97 C102 C106  | 121.5 (4)          |
| C31 C30 C29    | 119.9 (4)          | C101 C102 C97  | 118.8 (4)          |
| C30 C31 C32    | 120.9 (5)          | C101 C102 C106 | 119.4 (4)          |
| C27 C32 C36    | 121.6 (4)          | C98 C103 C104  | 113.7 (4)          |
| C31 C32 C27    | 119.3 (4)          | C98 C103 C105  | 110.5 (4)          |
| C31 C32 C36    | 119.1 (4)          | C104 C103 C105 | 109.5 (4)          |
| C28 C33 C34    | 113.2 (4)          | C102 C106 C107 | 113.7 (4)          |

| Atom | Atom | Atom | Angle <sup>o</sup> | Atom | Atom | Atom | Angle <sup>o</sup> |
|------|------|------|--------------------|------|------|------|--------------------|
| C28  | C33  | C35  | 109.4(4)           | C102 | C106 | C108 | 109.9(4)           |
| C35  | C33  | C34  | 110.0(4)           | C108 | C106 | C107 | 110.0(4)           |
| C32  | C36  | C37  | 113.2(4)           | C110 | C109 | C71  | 123.3(4)           |
| C32  | C36  | C38  | 109.6(4)           | C110 | C109 | Sn72 | 123.8(3)           |
| C37  | C36  | C38  | 109.9(4)           | C110 | C109 | C114 | 119.1(4)           |
| C40  | C39  | C2   | 118.0(4)           | C114 | C109 | C71  | 117.5(4)           |
| C40  | C39  | Sn1B | 113.3(4)           | C114 | C109 | Sn72 | 111.0(3)           |
| C44  | C39  | C2   | 121.5(4)           | C109 | C110 | C115 | 122.8(4)           |
| C44  | C39  | Sn1B | 119.3(4)           | C111 | C110 | C109 | 119.1(4)           |
| C44  | C39  | C40  | 119.6(4)           | C111 | C110 | C115 | 118.0(4)           |
| C39  | C40  | C45  | 119.6(4)           | C112 | C111 | C110 | 121.5(4)           |
| C41  | C40  | C39  | 119.1(4)           | C111 | C112 | C113 | 119.8(4)           |
| C41  | C40  | C45  | 121.3(4)           | C114 | C113 | C112 | 120.7(4)           |
| C42  | C41  | C40  | 121.6(4)           | C109 | C114 | C127 | 118.0(4)           |
| C41  | C42  | C43  | 119.6(4)           | C113 | C114 | C109 | 119.8(4)           |
| C42  | C43  | C44  | 120.4(4)           | C113 | C114 | C127 | 122.1(4)           |
| C39  | C44  | C57  | 120.6(4)           | C116 | C115 | C110 | 118.2(4)           |
| C43  | C44  | C39  | 119.7(4)           | C120 | C115 | C110 | 120.6(4)           |
| C43  | C44  | C57  | 119.6(4)           | C120 | C115 | C116 | 121.0(4)           |
| C46  | C45  | C40  | 121.0(4)           | C115 | C116 | C121 | 121.9(4)           |
| C46  | C45  | C50  | 120.3(4)           | C117 | C116 | C115 | 118.1(4)           |
| C50  | C45  | C40  | 118.7(4)           | C117 | C116 | C121 | 119.7(4)           |
| C45  | C46  | C51  | 121.9(4)           | C118 | C117 | C116 | 121.3(4)           |
| C47  | C46  | C45  | 118.2(4)           | C119 | C118 | C117 | 119.8(4)           |
| C47  | C46  | C51  | 119.8(4)           | C118 | C119 | C120 | 121.5(4)           |
| C48  | C47  | C46  | 121.4(4)           | C115 | C120 | C119 | 118.3(4)           |
| C49  | C48  | C47  | 120.1(4)           | C115 | C120 | C124 | 122.1(4)           |
| C48  | C49  | C50  | 120.4(4)           | C119 | C120 | C124 | 119.4(4)           |
| C45  | C50  | C54  | 120.7(4)           | C116 | C121 | C122 | 114.0(4)           |
| C49  | C50  | C45  | 119.5(4)           | C116 | C121 | C123 | 109.0(4)           |
| C49  | C50  | C54  | 119.8(4)           | C122 | C121 | C123 | 111.9(4)           |
| C46  | C51  | C52  | 113.5(4)           | C120 | C124 | C125 | 112.6(4)           |
| C46  | C51  | C53  | 111.3(4)           | C120 | C124 | C126 | 109.9(4)           |
| C52  | C51  | C53  | 108.4(4)           | C126 | C124 | C125 | 109.7(4)           |
| C55  | C54  | C50  | 114.1(4)           | C128 | C127 | C114 | 121.0(4)           |
| C56  | C54  | C50  | 110.4(4)           | C128 | C127 | C132 | 121.0(4)           |
| C56  | C54  | C55  | 110.4(4)           | C132 | C127 | C114 | 118.1(4)           |
| C58  | C57  | C44  | 119.9(4)           | C127 | C128 | C129 | 118.1(4)           |
| C58  | C57  | C62  | 119.8(4)           | C127 | C128 | C133 | 122.4(4)           |
| C62  | C57  | C44  | 120.3(4)           | C129 | C128 | C133 | 119.4(4)           |
| C57  | C58  | C63  | 120.8(4)           | C130 | C129 | C128 | 121.2(5)           |
| C59  | C58  | C57  | 118.9(4)           | C129 | C130 | C131 | 120.2(5)           |
| C59  | C58  | C63  | 120.1(4)           | C130 | C131 | C132 | 121.2(5)           |
| C60  | C59  | C58  | 121.3(4)           | C127 | C132 | C136 | 121.0(4)           |
| C61  | C60  | C59  | 119.9(4)           | C131 | C132 | C127 | 118.0(4)           |
| C60  | C61  | C62  | 121.6(4)           | C131 | C132 | C136 | 120.9(4)           |
| C57  | C62  | C66  | 122.1(4)           | C128 | C133 | C134 | 114.0(4)           |
| C61  | C62  | C57  | 118.4(4)           | C128 | C133 | C135 | 111.2(4)           |
| C61  | C62  | C66  | 119.4(4)           | C134 | C133 | C135 | 108.8(4)           |
| C58  | C63  | C64  | 113.3(4)           | C132 | C136 | C137 | 113.3(4)           |
| C65  | C63  | C58  | 109.4(4)           | C132 | C136 | C138 | 110.4(4)           |
| C65  | C63  | C64  | 110.4(4)           | C138 | C136 | C137 | 110.3(4)           |
| C62  | C66  | C67  | 114.0(4)           | O142 | C142 | C141 | 109.8(5)           |
| C62  | C66  | C68  | 110.6(4)           | C142 | O142 | C143 | 113.3(4)           |
| C68  | C66  | C67  | 110.0(4)           | O142 | C143 | C144 | 109.2(4)           |
| C72  | Sn71 | C79  | 111.16(17)         | O152 | C152 | C151 | 107.9(4)           |
| C72  | C71  | C109 | 136.5(5)           | C153 | O152 | C152 | 112.9(4)           |
| C71  | C72  | Sn71 | 105.3(4)           | O152 | C153 | C154 | 108.0(5)           |

**Table 6 Torsion Angles for WZ13FMI.**

| A    | B   | C   | D    | Angle/°   | A    | B    | C    | D    | Angle/°    |
|------|-----|-----|------|-----------|------|------|------|------|------------|
| Sn1  | C1  | C3  | C4   | -166.7(2) | Sn71 | C79  | C80  | C81  | -154.1(3)  |
| Sn1  | C1  | C3  | C8   | 6.4(4)    | Sn71 | C79  | C80  | C85  | 21.3(6)    |
| Sn1  | C9  | C10 | C11  | -166.2(3) | Sn71 | C79  | C84  | C83  | 159.4(3)   |
| Sn1  | C9  | C10 | C15  | 8.3(6)    | Sn71 | C79  | C84  | C97  | -16.7(5)   |
| Sn1  | C9  | C14 | C13  | 169.9(3)  | C71  | C72  | C73  | C74  | 17.2(8)    |
| Sn1  | C9  | C14 | C27  | -6.5(5)   | C71  | C72  | C73  | C78  | -166.6(5)  |
| C2   | C1  | C3  | C4   | 20.3(5)   | C71  | C109 | C110 | C111 | -177.6(4)  |
| C2   | C1  | C3  | C8   | -166.6(4) | C71  | C109 | C110 | C115 | -1.1(7)    |
| C2   | C39 | C40 | C41  | 170.8(4)  | C71  | C109 | C114 | C113 | 176.5(4)   |
| C2   | C39 | C40 | C45  | -5.8(6)   | C71  | C109 | C114 | C127 | 1.0(6)     |
| C2   | C39 | C44 | C43  | -170.1(4) | C72  | C71  | C109 | C110 | -113.3(7)  |
| C2   | C39 | C44 | C57  | 7.1(6)    | C72  | C71  | C109 | C114 | 72.2(8)    |
| C1   | C2  | C39 | C40  | 76.5(7)   | C72  | C73  | C74  | C75  | 176.2(5)   |
| C1   | C2  | C39 | C44  | -114.4(6) | C72  | C73  | C78  | C77  | -176.3(5)  |
| C1   | C3  | C4  | C5   | 173.0(3)  | C73  | C74  | C75  | C76  | 0.0        |
| C1   | C3  | C8  | C7   | -173.0(3) | C74  | C73  | C78  | C77  | 0.0        |
| C3   | C4  | C5  | C6   | 0.0       | C74  | C75  | C76  | C77  | 0.0        |
| C4   | C3  | C8  | C7   | 0.0       | C75  | C76  | C77  | C78  | 0.0        |
| C4   | C5  | C6  | C7   | 0.0       | C76  | C77  | C78  | C73  | 0.0        |
| C5   | C6  | C7  | C8   | 0.0       | C78  | C73  | C74  | C75  | 0.0        |
| C6   | C7  | C8  | C3   | 0.0       | Sn72 | C72B | C73B | C74B | 2.7(19)    |
| C8   | C3  | C4  | C5   | 0.0       | Sn72 | C72B | C73B | C78B | -175.4(10) |
| Sn1B | C2B | C3B | C4B  | 40(8)     | Sn72 | C109 | C110 | C111 | -153.2(3)  |
| Sn1B | C2B | C3B | C8B  | -151(5)   | Sn72 | C109 | C110 | C115 | 23.3(6)    |
| Sn1B | C39 | C40 | C41  | 150.4(4)  | Sn72 | C109 | C114 | C113 | 155.3(3)   |
| Sn1B | C39 | C40 | C45  | -26.3(5)  | Sn72 | C109 | C114 | C127 | -20.2(5)   |
| Sn1B | C39 | C44 | C43  | -148.2(4) | C71B | C72B | C73B | C74B | -167.0(15) |
| Sn1B | C39 | C44 | C57  | 29.0(6)   | C71B | C72B | C73B | C78B | 15(2)      |
| C1B  | C2B | C3B | C4B  | -160(8)   | C71B | C79  | C80  | C81  | -178.8(11) |
| C1B  | C2B | C3B | C8B  | 9(11)     | C71B | C79  | C80  | C85  | -3.4(12)   |
| C1B  | C9  | C10 | C11  | 164(2)    | C71B | C79  | C84  | C83  | 179.8(10)  |
| C1B  | C9  | C10 | C15  | -21(2)    | C71B | C79  | C84  | C97  | 3.7(11)    |
| C1B  | C9  | C14 | C13  | -163(2)   | C72B | C71B | C79  | C80  | -111(3)    |
| C1B  | C9  | C14 | C27  | 21(2)     | C72B | C71B | C79  | C84  | 71(3)      |
| C2B  | C1B | C9  | C10  | -119(9)   | C72B | C73B | C74B | C75B | -178.1(16) |
| C2B  | C1B | C9  | C14  | 49(10)    | C72B | C73B | C78B | C77B | 178.1(16)  |
| C2B  | C3B | C4B | C5B  | 169(7)    | C73B | C74B | C75B | C76B | 0.0        |
| C2B  | C3B | C8B | C7B  | -169(7)   | C74B | C73B | C78B | C77B | 0.0        |
| C3B  | C4B | C5B | C6B  | 0.0       | C74B | C75B | C76B | C77B | 0.0        |
| C4B  | C3B | C8B | C7B  | 0.0       | C75B | C76B | C77B | C78B | 0.0        |
| C4B  | C5B | C6B | C7B  | 0.0       | C76B | C77B | C78B | C73B | 0.0        |
| C5B  | C6B | C7B | C8B  | 0.0       | C78B | C73B | C74B | C75B | 0.0        |
| C6B  | C7B | C8B | C3B  | 0.0       | C79  | C71B | C72B | Sn72 | -151(2)    |
| C8B  | C3B | C4B | C5B  | 0.0       | C79  | C71B | C72B | C73B | 21(4)      |
| C9   | C1B | C2B | Sn1B | -141(7)   | C79  | C80  | C81  | C82  | -0.5(7)    |
| C9   | C1B | C2B | C3B  | 56(15)    | C79  | C80  | C85  | C86  | -77.5(6)   |
| C9   | C10 | C11 | C12  | 1.0(6)    | C79  | C80  | C85  | C90  | 105.7(5)   |
| C9   | C10 | C15 | C16  | -73.6(5)  | C79  | C84  | C97  | C98  | -95.0(5)   |
| C9   | C10 | C15 | C20  | 111.2(5)  | C79  | C84  | C97  | C102 | 80.1(5)    |
| C9   | C14 | C27 | C28  | -93.1(5)  | C80  | C79  | C84  | C83  | 1.7(7)     |
| C9   | C14 | C27 | C32  | 87.3(5)   | C80  | C79  | C84  | C97  | -174.4(4)  |
| C10  | C9  | C14 | C13  | 4.4(6)    | C80  | C81  | C82  | C83  | 1.2(7)     |
| C10  | C9  | C14 | C27  | -172.0(4) | C80  | C85  | C86  | C87  | -178.0(4)  |
| C10  | C11 | C12 | C13  | 1.5(7)    | C80  | C85  | C86  | C91  | -4.0(6)    |
| C10  | C15 | C16 | C17  | -179.0(4) | C80  | C85  | C90  | C89  | 177.1(4)   |
| C10  | C15 | C16 | C21  | -6.0(6)   | C80  | C85  | C90  | C94  | -0.5(6)    |
| C10  | C15 | C20 | C19  | 177.7(4)  | C81  | C80  | C85  | C86  | 97.9(5)    |
| C10  | C15 | C20 | C24  | 0.2(6)    | C81  | C80  | C85  | C90  | -78.9(5)   |
| C11  | C10 | C15 | C16  | 100.9(5)  | C81  | C82  | C83  | C84  | -0.4(7)    |
| C11  | C10 | C15 | C20  | -74.3(5)  | C82  | C83  | C84  | C79  | -1.1(7)    |
| C11  | C12 | C13 | C14  | -1.1(7)   | C82  | C83  | C84  | C97  | 174.7(4)   |
| C12  | C13 | C14 | C9   | -1.9(6)   | C83  | C84  | C97  | C98  | 89.0(5)    |
| C12  | C13 | C14 | C27  | 174.3(4)  | C83  | C84  | C97  | C102 | -95.9(5)   |
| C13  | C14 | C27 | C28  | 90.6(5)   | C84  | C79  | C80  | C81  | -0.9(6)    |
| C13  | C14 | C27 | C32  | -89.1(5)  | C84  | C79  | C80  | C85  | 174.5(4)   |
| C14  | C9  | C10 | C11  | -3.9(6)   | C84  | C97  | C98  | C99  | 174.0(4)   |
| C14  | C9  | C10 | C15  | 170.7(4)  | C84  | C97  | C98  | C103 | -10.0(6)   |
| C14  | C27 | C28 | C29  | 179.5(4)  | C84  | C97  | C102 | C101 | -174.1(4)  |
| C14  | C27 | C28 | C33  | -3.3(6)   | C84  | C97  | C102 | C106 | 12.4(6)    |
| C14  | C27 | C32 | C31  | 178.7(4)  | C85  | C80  | C81  | C82  | -176.1(4)  |
| C14  | C27 | C32 | C36  | 1.7(6)    | C85  | C86  | C87  | C88  | 1.4(6)     |

| A   | B   | C   | D   | Angle <sup>o</sup> | A    | B    | C    | D    | Angle <sup>o</sup> |
|-----|-----|-----|-----|--------------------|------|------|------|------|--------------------|
| C15 | C10 | C11 | C12 | -173.6(4)          | C85  | C86  | C91  | C92  | 140.9(5)           |
| C15 | C16 | C17 | C18 | 2.6(7)             | C85  | C86  | C91  | C93  | -96.2(5)           |
| C15 | C16 | C21 | C22 | 145.2(4)           | C85  | C90  | C94  | C95  | -139.5(4)          |
| C15 | C16 | C21 | C23 | -90.5(5)           | C85  | C90  | C94  | C96  | 98.0(5)            |
| C15 | C20 | C24 | C25 | -138.3(4)          | C86  | C85  | C90  | C89  | 0.3(6)             |
| C15 | C20 | C24 | C26 | 98.2(5)            | C86  | C85  | C90  | C94  | -177.3(4)          |
| C16 | C15 | C20 | C19 | 2.6(6)             | C86  | C87  | C88  | C89  | -0.6(7)            |
| C16 | C15 | C20 | C24 | -174.9(4)          | C87  | C86  | C91  | C92  | -45.1(6)           |
| C16 | C17 | C18 | C19 | -0.2(7)            | C87  | C86  | C91  | C93  | 77.9(5)            |
| C17 | C16 | C21 | C22 | -41.9(6)           | C87  | C88  | C89  | C90  | -0.3(7)            |
| C17 | C16 | C21 | C23 | 82.5(5)            | C88  | C89  | C90  | C85  | 0.5(7)             |
| C17 | C18 | C19 | C20 | -1.0(7)            | C88  | C89  | C90  | C94  | 178.1(4)           |
| C18 | C19 | C20 | C15 | -0.2(7)            | C89  | C90  | C94  | C95  | 42.9(6)            |
| C18 | C19 | C20 | C24 | 177.4(4)           | C89  | C90  | C94  | C96  | -79.6(5)           |
| C19 | C20 | C24 | C25 | 44.2(6)            | C90  | C85  | C86  | C87  | -1.2(6)            |
| C19 | C20 | C24 | C26 | -79.3(5)           | C90  | C85  | C86  | C91  | 172.9(4)           |
| C20 | C15 | C16 | C17 | -3.8(6)            | C91  | C86  | C87  | C88  | -172.9(4)          |
| C20 | C15 | C16 | C21 | 169.1(4)           | C97  | C98  | C99  | C100 | -0.2(7)            |
| C21 | C16 | C17 | C18 | -170.6(4)          | C97  | C98  | C103 | C104 | 151.4(4)           |
| C27 | C28 | C29 | C30 | 1.8(7)             | C97  | C98  | C103 | C105 | -85.0(5)           |
| C27 | C28 | C33 | C34 | 150.5(4)           | C97  | C102 | C106 | C107 | -151.4(4)          |
| C27 | C28 | C33 | C35 | -86.5(5)           | C97  | C102 | C106 | C108 | 84.8(5)            |
| C27 | C32 | C36 | C37 | -142.9(5)          | C98  | C97  | C102 | C101 | 1.0(6)             |
| C27 | C32 | C36 | C38 | 94.0(5)            | C98  | C97  | C102 | C106 | -172.5(4)          |
| C28 | C27 | C32 | C31 | -0.9(7)            | C98  | C99  | C100 | C101 | 1.6(7)             |
| C28 | C27 | C32 | C36 | -178.0(4)          | C99  | C98  | C103 | C104 | -32.6(6)           |
| C28 | C29 | C30 | C31 | -1.1(7)            | C99  | C98  | C103 | C105 | 91.0(5)            |
| C29 | C28 | C33 | C34 | -32.4(6)           | C99  | C100 | C101 | C102 | -1.7(8)            |
| C29 | C28 | C33 | C35 | 90.6(5)            | C100 | C101 | C102 | C97  | 0.4(7)             |
| C29 | C30 | C31 | C32 | -0.7(8)            | C100 | C101 | C102 | C106 | 174.0(4)           |
| C30 | C31 | C32 | C27 | 1.7(7)             | C101 | C102 | C106 | C107 | 35.1(6)            |
| C30 | C31 | C32 | C36 | 178.8(5)           | C101 | C102 | C106 | C108 | -88.7(5)           |
| C31 | C32 | C36 | C37 | 40.0(6)            | C102 | C97  | C98  | C99  | -1.1(6)            |
| C31 | C32 | C36 | C38 | -83.1(5)           | C102 | C97  | C98  | C103 | 175.0(4)           |
| C32 | C27 | C28 | C29 | -0.8(6)            | C103 | C98  | C99  | C100 | -176.3(4)          |
| C32 | C27 | C28 | C33 | 176.3(4)           | C109 | C71  | C72  | Sn71 | -158.4(6)          |
| C33 | C28 | C29 | C30 | -175.4(4)          | C109 | C71  | C72  | C73  | 14.2(11)           |
| C39 | C2  | C1  | Sn1 | -164.3(4)          | C109 | C110 | C111 | C112 | 2.3(6)             |
| C39 | C2  | C1  | C3  | 10.1(8)            | C109 | C110 | C115 | C116 | -79.5(6)           |
| C39 | C40 | C41 | C42 | -1.3(6)            | C109 | C110 | C115 | C120 | 104.5(5)           |
| C39 | C40 | C45 | C46 | -104.1(5)          | C109 | C114 | C127 | C128 | -104.2(5)          |
| C39 | C40 | C45 | C50 | 73.9(5)            | C109 | C114 | C127 | C132 | 74.1(5)            |
| C39 | C44 | C57 | C58 | -78.1(5)           | C110 | C109 | C114 | C113 | 1.7(6)             |
| C39 | C44 | C57 | C62 | 103.5(5)           | C110 | C109 | C114 | C127 | -173.8(4)          |
| C40 | C39 | C44 | C43 | -1.1(6)            | C110 | C111 | C112 | C113 | 0.2(7)             |
| C40 | C39 | C44 | C57 | 176.0(4)           | C110 | C115 | C116 | C117 | -174.9(4)          |
| C40 | C41 | C42 | C43 | 0.7(7)             | C110 | C115 | C116 | C121 | -0.9(6)            |
| C40 | C45 | C46 | C47 | 174.3(4)           | C110 | C115 | C120 | C119 | 174.7(4)           |
| C40 | C45 | C46 | C51 | -7.1(6)            | C110 | C115 | C120 | C124 | -0.2(6)            |
| C40 | C45 | C50 | C49 | -174.6(4)          | C111 | C110 | C115 | C116 | 97.0(5)            |
| C40 | C45 | C50 | C54 | 8.9(6)             | C111 | C110 | C115 | C120 | -78.9(5)           |
| C41 | C40 | C45 | C46 | 79.4(5)            | C111 | C112 | C113 | C114 | -1.8(6)            |
| C41 | C40 | C45 | C50 | -102.7(5)          | C112 | C113 | C114 | C109 | 0.8(6)             |
| C41 | C42 | C43 | C44 | -0.3(7)            | C112 | C113 | C114 | C127 | 176.0(4)           |
| C42 | C43 | C44 | C39 | 0.5(6)             | C113 | C114 | C127 | C128 | 80.5(6)            |
| C42 | C43 | C44 | C57 | -176.6(4)          | C113 | C114 | C127 | C132 | -101.3(5)          |
| C43 | C44 | C57 | C58 | 99.0(5)            | C114 | C109 | C110 | C111 | -3.2(6)            |
| C43 | C44 | C57 | C62 | -79.3(5)           | C114 | C109 | C110 | C115 | 173.4(4)           |
| C44 | C39 | C40 | C41 | 1.5(6)             | C114 | C127 | C128 | C129 | 172.5(4)           |
| C44 | C39 | C40 | C45 | -175.2(4)          | C114 | C127 | C128 | C133 | -8.9(7)            |
| C44 | C57 | C58 | C59 | 179.6(4)           | C114 | C127 | C132 | C131 | -172.7(4)          |
| C44 | C57 | C58 | C63 | -5.6(6)            | C114 | C127 | C132 | C136 | 10.4(6)            |
| C44 | C57 | C62 | C61 | -178.5(4)          | C115 | C110 | C111 | C112 | -174.4(4)          |
| C44 | C57 | C62 | C66 | 5.3(6)             | C115 | C116 | C117 | C118 | 0.2(7)             |
| C45 | C40 | C41 | C42 | 175.3(4)           | C115 | C116 | C121 | C122 | 141.8(5)           |
| C45 | C46 | C47 | C48 | 1.7(7)             | C115 | C116 | C121 | C123 | -92.5(5)           |
| C45 | C46 | C51 | C52 | 146.2(4)           | C115 | C120 | C124 | C125 | -133.8(4)          |
| C45 | C46 | C51 | C53 | -91.2(5)           | C115 | C120 | C124 | C126 | 103.6(5)           |
| C45 | C50 | C54 | C55 | -155.5(4)          | C116 | C115 | C120 | C119 | -1.2(6)            |
| C45 | C50 | C54 | C56 | 79.5(5)            | C116 | C115 | C120 | C124 | -176.0(4)          |
| C46 | C45 | C50 | C49 | 3.4(6)             | C116 | C117 | C118 | C119 | -1.2(7)            |
| C46 | C45 | C50 | C54 | -173.1(4)          | C117 | C116 | C121 | C122 | -44.3(6)           |

| A    | B   | C   | D   | Angle <sup>o</sup> | A    | B    | C    | D    | Angle <sup>o</sup> |
|------|-----|-----|-----|--------------------|------|------|------|------|--------------------|
| C46  | C47 | C48 | C49 | 0.5(7)             | C117 | C116 | C121 | C123 | 81.5(5)            |
| C47  | C46 | C51 | C52 | -35.3(6)           | C117 | C118 | C119 | C120 | 1.0(7)             |
| C47  | C46 | C51 | C53 | 87.3(5)            | C118 | C119 | C120 | C115 | 0.1(7)             |
| C47  | C48 | C49 | C50 | -0.8(7)            | C118 | C119 | C120 | C124 | 175.1(4)           |
| C48  | C49 | C50 | C45 | -1.1(7)            | C119 | C120 | C124 | C125 | 51.4(5)            |
| C48  | C49 | C50 | C54 | 175.4(4)           | C119 | C120 | C124 | C126 | -71.2(5)           |
| C49  | C50 | C54 | C55 | 28.1(6)            | C120 | C115 | C116 | C117 | 1.0(6)             |
| C49  | C50 | C54 | C56 | -97.0(5)           | C120 | C115 | C116 | C121 | 175.1(4)           |
| C50  | C45 | C46 | C47 | -3.6(6)            | C121 | C116 | C117 | C118 | -174.0(4)          |
| C50  | C45 | C46 | C51 | 174.9(4)           | C127 | C128 | C129 | C130 | 1.5(7)             |
| C51  | C46 | C47 | C48 | -176.9(4)          | C127 | C128 | C133 | C134 | 148.2(4)           |
| C57  | C58 | C59 | C60 | -0.3(7)            | C127 | C128 | C133 | C135 | -88.3(5)           |
| C57  | C58 | C63 | C64 | 141.6(5)           | C127 | C132 | C136 | C137 | -154.0(4)          |
| C57  | C58 | C63 | C65 | -94.7(5)           | C127 | C132 | C136 | C138 | 81.7(5)            |
| C57  | C62 | C66 | C67 | -138.7(4)          | C128 | C127 | C132 | C131 | 5.5(6)             |
| C57  | C62 | C66 | C68 | 96.7(5)            | C128 | C127 | C132 | C136 | -171.3(4)          |
| C58  | C57 | C62 | C61 | 3.1(6)             | C128 | C129 | C130 | C131 | 2.8(8)             |
| C58  | C57 | C62 | C66 | -173.0(4)          | C129 | C128 | C133 | C134 | -33.2(6)           |
| C58  | C59 | C60 | C61 | 1.4(7)             | C129 | C128 | C133 | C135 | 90.2(5)            |
| C59  | C58 | C63 | C64 | -43.6(6)           | C129 | C130 | C131 | C132 | -2.9(8)            |
| C59  | C58 | C63 | C65 | 80.1(6)            | C130 | C131 | C132 | C127 | -1.2(7)            |
| C59  | C60 | C61 | C62 | -0.3(7)            | C130 | C131 | C132 | C136 | 175.7(4)           |
| C60  | C61 | C62 | C57 | -2.0(7)            | C131 | C132 | C136 | C137 | 29.2(6)            |
| C60  | C61 | C62 | C66 | 174.3(4)           | C131 | C132 | C136 | C138 | -95.1(5)           |
| C61  | C62 | C66 | C67 | 45.2(5)            | C132 | C127 | C128 | C129 | -5.7(7)            |
| C61  | C62 | C66 | C68 | -79.4(5)           | C132 | C127 | C128 | C133 | 172.9(4)           |
| C62  | C57 | C58 | C59 | -2.0(6)            | C133 | C128 | C129 | C130 | -177.2(5)          |
| C62  | C57 | C58 | C63 | 172.8(4)           | C141 | C142 | O142 | C143 | -175.8(5)          |
| C63  | C58 | C59 | C60 | -175.2(4)          | C142 | O142 | C143 | C144 | 179.8(5)           |
| Sn71 | C72 | C73 | C74 | -171.9(3)          | C151 | C152 | O152 | C153 | -179.5(5)          |
| Sn71 | C72 | C73 | C78 | 4.4(6)             | C152 | O152 | C153 | C154 | 174.5(5)           |

**Table 7 Hydrogen Atom Coordinates ( $\text{\AA}\times 10^4$ ) and Isotropic Displacement Parameters ( $\text{\AA}^2\times 10^3$ ) for WZ13FMI.**

| Atom | x       | y       | z        | U(eq) |
|------|---------|---------|----------|-------|
| H2   | 2881.14 | 1997.44 | 9251.47  | 20    |
| H4   | 1008.69 | 2619.41 | 8974.54  | 23    |
| H5   | -194.94 | 3164.82 | 9179.4   | 23    |
| H6   | -525.29 | 3923.49 | 10155.41 | 27    |
| H7   | 348     | 4136.75 | 10926.55 | 26    |
| H8   | 1551.64 | 3591.35 | 10721.69 | 26    |
| H1B  | 3053.06 | 3075.53 | 10530.32 | 9     |
| H4B  | 1152.31 | 2332.79 | 9414.33  | 23    |
| H5B  | -87.12  | 2739.7  | 9369.17  | 23    |
| H6B  | -566.43 | 3774.52 | 10018.72 | 27    |
| H7B  | 193.69  | 4402.42 | 10713.44 | 27    |
| H8B  | 1433.13 | 3995.52 | 10758.6  | 25    |
| H11  | 2447.02 | 4182.92 | 12773.27 | 24    |
| H12  | 1881.16 | 3192.08 | 13467.22 | 27    |
| H13  | 1744.88 | 2029.63 | 12961.4  | 22    |
| H17  | 4772.77 | 4741.25 | 10739.29 | 31    |
| H18  | 4155.18 | 5816.25 | 10434.64 | 33    |
| H19  | 2857.78 | 5945.8  | 10757.58 | 31    |
| H21  | 3919.15 | 3133.28 | 11642.93 | 28    |
| H22A | 4800.67 | 3197.24 | 10571.84 | 55    |
| H22B | 5160.05 | 2838.08 | 11215.96 | 55    |
| H22C | 5351.53 | 3685.83 | 10969.57 | 55    |
| H23A | 4869.36 | 4221.21 | 12152.83 | 53    |
| H23B | 4792.04 | 3368.12 | 12423.2  | 53    |
| H23C | 4082.44 | 3921.25 | 12571.64 | 53    |
| H24  | 1580.92 | 4550.19 | 11588.69 | 32    |
| H25A | 1609.49 | 5933.31 | 10806.8  | 55    |
| H25B | 889.7   | 5398.13 | 11014.64 | 55    |
| H25C | 1582.23 | 5134.99 | 10446.95 | 55    |
| H26A | 1869.91 | 5274.32 | 12522.78 | 53    |
| H26B | 1121.69 | 5602.46 | 12261.98 | 53    |
| H26C | 1917.58 | 6017.69 | 12040.83 | 53    |
| H29  | 1128.43 | 476.43  | 10840.64 | 32    |
| H30  | 2177.07 | -302.99 | 10816.45 | 38    |
| H31  | 3228.18 | 87.93   | 11292.74 | 37    |
| H33  | 975.95  | 2352.78 | 11415.21 | 28    |
| H34A | 711.22  | 1683.96 | 10363.21 | 47    |
| H34B | 13.41   | 2124.01 | 10789.39 | 47    |
| H34C | 77.8    | 1235.11 | 10883.18 | 47    |
| H35A | 208.84  | 1099.09 | 12147.49 | 41    |
| H35B | -140.56 | 1925.06 | 12152.2  | 41    |
| H35C | 603.87  | 1765.71 | 12504.58 | 41    |
| H36  | 3521.11 | 1903.02 | 11939.99 | 33    |
| H37A | 4295.86 | 549.39  | 11488.49 | 60    |
| H37B | 4691.44 | 1307.38 | 11678.4  | 60    |
| H37C | 4282.05 | 1277.44 | 10992.95 | 60    |
| H38A | 3016.59 | 1234.1  | 12965.59 | 52    |
| H38B | 3919.18 | 1153.91 | 12870.67 | 52    |
| H38C | 3411.16 | 476.55  | 12668.2  | 52    |
| H41  | 2706.01 | 3292.6  | 6973.44  | 22    |
| H42  | 2333.64 | 2206.72 | 6474.52  | 27    |
| H43  | 1949.64 | 1162.31 | 7188.1   | 24    |
| H47  | 2412.96 | 5271.14 | 8865.15  | 27    |
| H48  | 3602.77 | 5203.79 | 9219.14  | 33    |
| H49  | 4356.75 | 4148.95 | 8976.79  | 31    |
| H51  | 1451.87 | 3809.66 | 8133.97  | 24    |
| H52A | 1093.66 | 4611.11 | 9142.99  | 44    |
| H52B | 578.8   | 4701.59 | 8532.08  | 44    |
| H52C | 1217.83 | 5310.7  | 8606.54  | 44    |
| H53A | 1947.97 | 5196.43 | 7443.23  | 41    |
| H53B | 1250.59 | 4708.36 | 7266.92  | 41    |
| H53C | 2095.61 | 4390.17 | 7100.34  | 41    |
| H54  | 3804.55 | 2443.85 | 8329.42  | 29    |
| H55A | 5014.47 | 2317.99 | 8635.49  | 48    |
| H55B | 4483.08 | 2722.24 | 9260.49  | 48    |
| H55C | 5078.08 | 3203.09 | 8728.97  | 48    |
| H56A | 4106.68 | 3007.82 | 7226.22  | 46    |
| H56B | 4824.07 | 2545.3  | 7408.12  | 46    |
| H56C | 4806.84 | 3437.56 | 7471.28  | 46    |



| Atom | x        | y       | z       | U(eq) |
|------|----------|---------|---------|-------|
| H59  | 2661.45  | -457.94 | 9328.35 | 30    |
| H60  | 1401.24  | -759.45 | 9692.82 | 33    |
| H61  | 452.69   | -28.91  | 9334.87 | 28    |
| H63  | 3358.69  | 1180.65 | 8342.22 | 34    |
| H64A | 3831.35  | -19.51  | 9180.99 | 72    |
| H64B | 3653.54  | 807.72  | 9465.71 | 72    |
| H64C | 4350.13  | 668.54  | 8856.7  | 72    |
| H65A | 4102.38  | 249.04  | 7694.78 | 71    |
| H65B | 3269.94  | 308.44  | 7482.13 | 71    |
| H65C | 3473.23  | -362.6  | 7984.55 | 71    |
| H66  | 694.08   | 1663.01 | 8313.02 | 24    |
| H67A | -577.8   | 1587    | 8831.03 | 41    |
| H67B | -48.55   | 1559.27 | 9434.33 | 41    |
| H67C | -424.85  | 806.33  | 9206.95 | 41    |
| H68A | 695.27   | 722.9   | 7485.28 | 38    |
| H68B | -143.97  | 1049.79 | 7675.14 | 38    |
| H68C | 69.13    | 260.36  | 8000.94 | 38    |
| H71  | 7089.25  | 2268.31 | 4308.71 | 21    |
| H74  | 7714.95  | 4195.84 | 4030.93 | 20    |
| H75  | 8246.22  | 5359.13 | 4216.86 | 26    |
| H76  | 8911.41  | 5511.89 | 5166.28 | 26    |
| H77  | 9045.33  | 4501.36 | 5929.78 | 28    |
| H78  | 8514.07  | 3338.07 | 5743.86 | 25    |
| H71B | 7861.19  | 1766.86 | 5644.7  | 40    |
| H74B | 7695.74  | 3865.79 | 4310.26 | 20    |
| H75B | 8100.69  | 5112.36 | 4295.46 | 26    |
| H76B | 8741.26  | 5542.06 | 5188.55 | 27    |
| H77B | 8976.89  | 4725.19 | 6096.45 | 29    |
| H78B | 8571.94  | 3478.61 | 6111.26 | 25    |
| H81  | 8726.99  | 1829.19 | 7893.44 | 29    |
| H82  | 7587.93  | 2201.85 | 8548.59 | 32    |
| H83  | 6578.28  | 2575.29 | 7978.28 | 25    |
| H87  | 9885.15  | 228.02  | 5730.71 | 29    |
| H88  | 10973.49 | 963.95  | 5591.68 | 33    |
| H89  | 10928.19 | 2169.32 | 6027.44 | 31    |
| H91  | 8039.11  | 750.03  | 6545.78 | 33    |
| H92A | 8381.92  | 286.96  | 5374.03 | 78    |
| H92B | 7921.71  | -315.69 | 5895.98 | 78    |
| H92C | 8821.14  | -388.62 | 5694.21 | 78    |
| H93A | 9089.84  | -330.17 | 6945.89 | 59    |
| H93B | 8189.83  | -408.17 | 7142.33 | 59    |
| H93C | 8625.82  | 257.02  | 7460.68 | 59    |
| H94  | 9276.09  | 3137.78 | 6813.21 | 29    |
| H95A | 10817.19 | 3390.02 | 6183.42 | 51    |
| H95B | 10191.25 | 4022.01 | 6389.23 | 51    |
| H95C | 10120.88 | 3477.84 | 5750.32 | 51    |
| H96A | 9806.11  | 2619.89 | 7772.26 | 51    |
| H96B | 10113.11 | 3456.77 | 7616.73 | 51    |
| H96C | 10643.81 | 2760.71 | 7364.76 | 51    |
| H99  | 5648.35  | 3988.87 | 5839.5  | 29    |
| H100 | 5000.96  | 3006.63 | 5438.17 | 35    |
| H101 | 5221.43  | 1782.17 | 5775.32 | 35    |
| H103 | 7233.71  | 3845.99 | 6751.03 | 28    |
| H10A | 6996.74  | 4555.33 | 5713.91 | 42    |
| H10B | 7163.18  | 5058.65 | 6353.84 | 42    |
| H10C | 6312.3   | 4954.11 | 6200.5  | 42    |
| H10D | 5776.72  | 4391.47 | 7359.27 | 44    |
| H10E | 6561.1   | 4650.6  | 7589.73 | 44    |
| H10F | 6275.91  | 3804.85 | 7731.6  | 44    |
| H106 | 6681.75  | 1154.54 | 6711.23 | 31    |
| H10G | 5469.82  | 656.17  | 6003.14 | 68    |
| H10H | 6078.97  | 117.84  | 6288.96 | 68    |
| H10I | 6339.85  | 692.89  | 5651.79 | 68    |
| H10J | 5764.26  | 1437.31 | 7670.49 | 55    |
| H10K | 5681.89  | 573.24  | 7488.73 | 55    |
| H10L | 5098.42  | 1176.12 | 7255.33 | 55    |
| H111 | 6559.55  | 3634.34 | 2243.12 | 24    |
| H112 | 7709.21  | 3429.82 | 1539.83 | 23    |
| H113 | 8710.77  | 2883.07 | 2021.06 | 25    |
| H117 | 4532.79  | 2340.65 | 4081.32 | 32    |
| H118 | 4067.77  | 3513.84 | 4426.65 | 33    |
| H119 | 4854.63  | 4550.75 | 4266.27 | 29    |

| Atom | x        | y       | z       | U(eq) |
|------|----------|---------|---------|-------|
| H12I | 6425.13  | 1922.37 | 3318.97 | 35    |
| H12A | 5743.64  | 1351.65 | 4347.33 | 78    |
| H12B | 5844.12  | 801.49  | 3693.02 | 78    |
| H12C | 5049.42  | 1208.15 | 3925.86 | 78    |
| H12D | 5056.97  | 1878.58 | 2706.19 | 59    |
| H12E | 5761.6   | 1335.79 | 2480.02 | 59    |
| H12F | 5849.72  | 2219.58 | 2340.19 | 59    |
| H124 | 6812.57  | 4575.3  | 3483.77 | 27    |
| H12G | 5739.79  | 5408.11 | 4426.1  | 47    |
| H12H | 6604.38  | 5641.76 | 4176.35 | 47    |
| H12I | 6408.21  | 4921.08 | 4676.4  | 47    |
| H12J | 6046.31  | 4875.95 | 2617.73 | 40    |
| H12K | 6317.99  | 5631.71 | 2939.53 | 40    |
| H12L | 5474.18  | 5327.99 | 3177.71 | 40    |
| H129 | 10342.77 | 2699.17 | 4017.58 | 37    |
| H130 | 10166.98 | 1451.28 | 4344.87 | 44    |
| H131 | 9193.02  | 765.99  | 3977.31 | 35    |
| H133 | 9057.2   | 3861.01 | 3260.19 | 34    |
| H13A | 9661.93  | 4009.64 | 4283.48 | 62    |
| H13B | 9949.07  | 4605.73 | 3671.19 | 62    |
| H13C | 10464.07 | 3897.56 | 3802.6  | 62    |
| H13D | 10526.29 | 3432.04 | 2563.92 | 50    |
| H13E | 10129.99 | 4214.8  | 2427.76 | 50    |
| H13F | 9768.78  | 3449.73 | 2209.92 | 50    |
| H136 | 7643.22  | 1497.94 | 3232.49 | 31    |
| H13G | 8288.77  | 119.69  | 3639.72 | 61    |
| H13H | 7432.32  | 232.22  | 3502.33 | 61    |
| H13I | 7717.1   | 613.7   | 4163.09 | 61    |
| H13J | 8460.4   | 1412.41 | 2166.95 | 45    |
| H13K | 7952.78  | 670.28  | 2287.52 | 45    |
| H13L | 8815.11  | 651.91  | 2426.99 | 45    |
| H    | 8374.26  | 2029.22 | 245.41  | 74    |
| HA   | 8306.29  | 2904.46 | 406.9   | 74    |
| HB   | 8241.43  | 2614.77 | -364.26 | 74    |
| HC   | 7178.49  | 2263.12 | 838.81  | 60    |
| HD   | 7045.63  | 2901.25 | 272.21  | 60    |
| HE   | 5980.14  | 2281.06 | -55.14  | 60    |
| HF   | 6050.64  | 1651.1  | 537.26  | 60    |
| HG   | 6124.87  | 1373.58 | -923.57 | 67    |
| HH   | 5436.21  | 1136.8  | -330.71 | 67    |
| HI   | 6243.36  | 739.16  | -351.55 | 67    |
| HJ   | 4206.51  | 1249.15 | 5274.09 | 81    |
| HK   | 3833.24  | 435.25  | 5407.56 | 81    |
| HL   | 3575.21  | 1094.32 | 5942.6  | 81    |
| HM   | 3307.87  | 1095.96 | 4523.03 | 49    |
| HN   | 2671.75  | 900.64  | 5182.38 | 49    |
| HO   | 1962.67  | 1938.73 | 4875.74 | 66    |
| HP   | 2599.21  | 2211.44 | 4243.57 | 66    |
| HQ   | 2128.49  | 3078.16 | 5467.03 | 68    |
| HR   | 1855     | 3241.64 | 4723.09 | 68    |
| HS   | 2726.39  | 3352.04 | 4809.09 | 68    |

**Table 8 Atomic Occupancy for WZ13FMI.**

| Atom | Occupancy | Atom | Occupancy | Atom | Occupancy |
|------|-----------|------|-----------|------|-----------|
| Sn1  | 0.96      | C2   | 0.96      | H2   | 0.96      |
| C1   | 0.96      | C3   | 0.96      | C4   | 0.96      |
| H4   | 0.96      | C5   | 0.96      | H5   | 0.96      |
| C6   | 0.96      | H6   | 0.96      | C7   | 0.96      |
| H7   | 0.96      | C8   | 0.96      | H8   | 0.96      |
| Sn1B | 0.04      | C1B  | 0.04      | H1B  | 0.04      |
| C2B  | 0.04      | C3B  | 0.04      | C4B  | 0.04      |
| H4B  | 0.04      | C5B  | 0.04      | H5B  | 0.04      |
| C6B  | 0.04      | H6B  | 0.04      | C7B  | 0.04      |
| H7B  | 0.04      | C8B  | 0.04      | H8B  | 0.04      |
| Sn71 | 0.74      | C71  | 0.74      | H71  | 0.74      |
| C72  | 0.74      | C73  | 0.74      | C74  | 0.74      |
| H74  | 0.74      | C75  | 0.74      | H75  | 0.74      |
| C76  | 0.74      | H76  | 0.74      | C77  | 0.74      |
| H77  | 0.74      | C78  | 0.74      | H78  | 0.74      |
| Sn72 | 0.26      | C71B | 0.26      | H71B | 0.26      |
| C72B | 0.26      | C73B | 0.26      | C74B | 0.26      |
| H74B | 0.26      | C75B | 0.26      | H75B | 0.26      |
| C76B | 0.26      | H76B | 0.26      | C77B | 0.26      |
| H77B | 0.26      | C78B | 0.26      | H78B | 0.26      |

**Experimental**

Single crystals of  $C_{72}H_{90}OSn$  [WZ13FMI] were [1]. A suitable crystal was selected and [1] on a **Bruker APEX-II CCD** diffractometer. The crystal was kept at 90.15 K during data collection. Using Olex2 [1], the structure was solved with the olex2.solve [2] structure solution program using Charge Flipping and refined with the SHELXL [3] refinement package using Least Squares minimisation.

1. Dolomanov, O.V., Bourhis, L.J., Gildea, R.J., Howard, J.A.K. & Puschmann, H. (2009), *J. Appl. Cryst.* 42, 339-341.
2. Bourhis, L.J., Dolomanov, O.V., Gildea, R.J., Howard, J.A.K., Puschmann, H. (2015). *Acta Cryst.* A71, 59-75.
3. Sheldrick, G.M. (2015). *Acta Cryst.* C71, 3-8.

**Crystal structure determination of [WZ13FMI]**

**Crystal Data** for  $C_{72}H_{90}OSn$  ( $M = 1090.12$  g/mol): triclinic, space group P-1 (no. 2),  $a = 17.8418(9)$  Å,  $b = 17.8598(9)$  Å,  $c = 19.2380(10)$  Å,  $\alpha = 88.9389(8)^\circ$ ,  $\beta = 81.5494(8)^\circ$ ,  $\gamma = 89.9199(8)^\circ$ ,  $V = 6062.6(5)$  Å<sup>3</sup>,  $Z = 4$ ,  $T = 90.15$  K,  $\mu(\text{MoK}\alpha) = 0.464$  mm<sup>-1</sup>,  $D_{\text{calc}} = 1.194$  g/cm<sup>3</sup>, 43726 reflections measured ( $3.674^\circ \leq 2\theta \leq 50.5^\circ$ ), 21946 unique ( $R_{\text{int}} = 0.0589$ ,  $R_{\text{sigma}} = 0.0826$ ) which were used in all calculations. The final  $R_1$  was 0.0617 ( $I > 2\sigma(I)$ ) and  $wR_2$  was 0.1173 (all data).

**Refinement model description**

Number of restraints - 149, number of constraints - unknown.

Details:

1. Fixed Uiso  
At 1.2 times of:  
All C(H) groups, All C(H,H) groups  
At 1.5 times of:  
All C(H,H,H) groups
2. Restrained distances  
H8B-H24  
1.95 with sigma of 0.01  
C72-C73 = C72B-C73B  
1.5 with sigma of 0.01  
C72-C74 = C72-C78 = C72B-C74B = C72B-C78B  
with sigma of 0.01
3. Uiso/Uanis restraints and constraints  
Sn71 = Sn72: within 2A with sigma of 0.002 and sigma for terminal atoms of 0.004 within 2A  
Sn1 = Sn1B: within 5A with sigma of 0.003 and sigma for terminal atoms of 0.003 within 5A  
C1 = C2B: within 2A with sigma of 0.003 and sigma for terminal atoms of 0.006 within 2A  
C3 = C3B: within 2A with sigma of 0.003 and sigma for terminal atoms of 0.006 within 2A  
C4 = C4B: within 2A with sigma of 0.003 and sigma for terminal atoms of 0.006 within 2A  
C5 = C5B: within 2A with sigma of 0.003 and sigma for terminal atoms of 0.006 within 2A  
C6 = C6B: within 2A with sigma of 0.003 and sigma for terminal atoms of 0.006 within 2A  
C7 = C7B: within 2A with sigma of 0.003 and sigma for terminal atoms of 0.006 within 2A  
C8 = C8B: within 2A with sigma of 0.003 and sigma for terminal atoms of 0.006 within 2A  
Sn72 = C71: within 2A with sigma of 0.003 and sigma for terminal atoms of 0.006 within 2A  
C73 = C73B: within 2A with sigma of 0.003 and sigma for terminal atoms of 0.006 within 2A  
C74 = C74B: within 2A with sigma of 0.001 and sigma for terminal atoms of 0.002 within 2A  
C75 = C75B: within 2A with sigma of 0.003 and sigma for terminal atoms of 0.006 within 2A  
C76 = C76B: within 2A with sigma of 0.003 and sigma for terminal atoms of 0.006 within 2A  
C77 = C77B: within 2A with sigma of 0.003 and sigma for terminal atoms of 0.006 within 2A  
C78 = C78B: within 2A with sigma of 0.003 and sigma for terminal atoms of 0.006 within 2A  
Uanis(C71) = Ueq, Uanis(C72) = Ueq, Uanis(C73) = Ueq, Uanis(C73B) = Ueq, Uanis(C74B) = Ueq: with sigma of 0.003 and sigma for terminal atoms of 0.006
4. Same fragment restrains  
{Sn1, C2, C1, C3, C4, C5, C6, C7, C8} sigma for 1-2: 0.02, 1-3: 0.04 as in  
{Sn1B, C1B, C2B, C3B, C4B, C5B, C6B, C7B, C8B}

## 5. Others

Fixed Sof: Sn1(0.96) C2(0.96) H2(0.96) C1(0.96) C3(0.96) C4(0.96) H4(0.96)  
C5(0.96) H5(0.96) C6(0.96) H6(0.96) C7(0.96) H7(0.96) C8(0.96) H8(0.96)  
Sn1B(0.04) C1B(0.04) H1B(0.04) C2B(0.04) C3B(0.04) C4B(0.04) H4B(0.04)  
C5B(0.04) H5B(0.04) C6B(0.04) H6B(0.04) C7B(0.04) H7B(0.04) C8B(0.04)  
H8B(0.04) Sn71(0.74) C71(0.74) H71(0.74) C72(0.74) C73(0.74) C74(0.74)  
H74(0.74) C75(0.74) H75(0.74) C76(0.74) H76(0.74) C77(0.74) H77(0.74)  
C78(0.74) H78(0.74) Sn72(0.26) C71B(0.26) H71B(0.26) C72B(0.26) C73B(0.26)  
C74B(0.26) H74B(0.26) C75B(0.26) H75B(0.26) C76B(0.26) H76B(0.26) C77B(0.26)  
H77B(0.26) C78B(0.26) H78B(0.26)

### 6.a Ternary CH refined with riding coordinates:

C21(H21), C24(H24), C33(H33), C36(H36), C51(H51), C54(H54), C63(H63),  
C66(H66), C91(H91), C94(H94), C103(H103), C106(H106), C121(H121), C124(H124),  
C133(H133), C136(H136)

### 6.b Secondary CH2 refined with riding coordinates:

C142(HC,HD), C143(HE,HF), C152(HM,HN), C153(HO,HP)

### 6.c Aromatic/amide H refined with riding coordinates:

C2(H2), C4(H4), C5(H5), C6(H6), C7(H7), C8(H8), C1B(H1B), C4B(H4B), C5B(H5B),  
C6B(H6B), C7B(H7B), C8B(H8B), C11(H11), C12(H12), C13(H13), C17(H17), C18(H18),  
C19(H19), C29(H29), C30(H30), C31(H31), C41(H41), C42(H42), C43(H43),  
C47(H47), C48(H48), C49(H49), C59(H59), C60(H60), C61(H61), C71(H71), C74(H74),  
C75(H75), C76(H76), C77(H77), C78(H78), C71B(H71B), C74B(H74B), C75B(H75B),  
C76B(H76B), C77B(H77B), C78B(H78B), C81(H81), C82(H82), C83(H83), C87(H87),  
C88(H88), C89(H89), C99(H99), C100(H100), C101(H101), C111(H111), C112(H112),  
C113(H113), C117(H117), C118(H118), C119(H119), C129(H129), C130(H130),  
C131(H131)

### 6.d Fitted hexagon refined as free rotating group:

C3(C4,C5,C6,C7,C8), C3B(C4B,C5B,C6B,C7B,C8B), C73(C74,C75,C76,C77,C78),  
C73B(C74B,C75B,C76B,C77B,C78B)

### 6.e Idealised Me refined as rotating group:

C22(H22A,H22B,H22C), C23(H23A,H23B,H23C), C25(H25A,H25B,H25C), C26(H26A,H26B,  
H26C), C34(H34A,H34B,H34C), C35(H35A,H35B,H35C), C37(H37A,H37B,H37C), C38(H38A,  
H38B,H38C), C52(H52A,H52B,H52C), C53(H53A,H53B,H53C), C55(H55A,H55B,H55C),  
C56(H56A,H56B,H56C), C64(H64A,H64B,H64C), C65(H65A,H65B,H65C), C67(H67A,H67B,  
H67C), C68(H68A,H68B,H68C), C92(H92A,H92B,H92C), C93(H93A,H93B,H93C), C95(H95A,  
H95B,H95C), C96(H96A,H96B,H96C), C104(H10A,H10B,H10C), C105(H10D,H10E,H10F),  
C107(H10G,H10H,H10I), C108(H10J,H10K,H10L), C122(H12A,H12B,H12C), C123(H12D,  
H12E,H12F), C125(H12G,H12H,H12I), C126(H12J,H12K,H12L), C134(H13A,H13B,H13C),  
C135(H13D,H13E,H13F), C137(H13G,H13H,H13I), C138(H13J,H13K,H13L), C141(H,HA,  
HB), C144(HG,HH,HI), C151(HJ,HK,HL), C154(HQ,HR,HS)

This report has been created with Olex2, compiled on 2023.08.24 svn.re1ec1418 for OlexSys. Please [let us know](#) if there are any errors or if you would like to have additional features.
