# Supplementary material for: Sn(ii)–carbon bond reactivity: radical generation and consumption via reactions of a stannylene with alkynes
Source: Royal Society of Chemistry journal article supplement (doi:10.1039/d3cc04014c), 2023-01-01
Supplement: d3cc04014c2.pdf [file d3cc04014c2.pdf]

## WZ14FMI

b"n \n

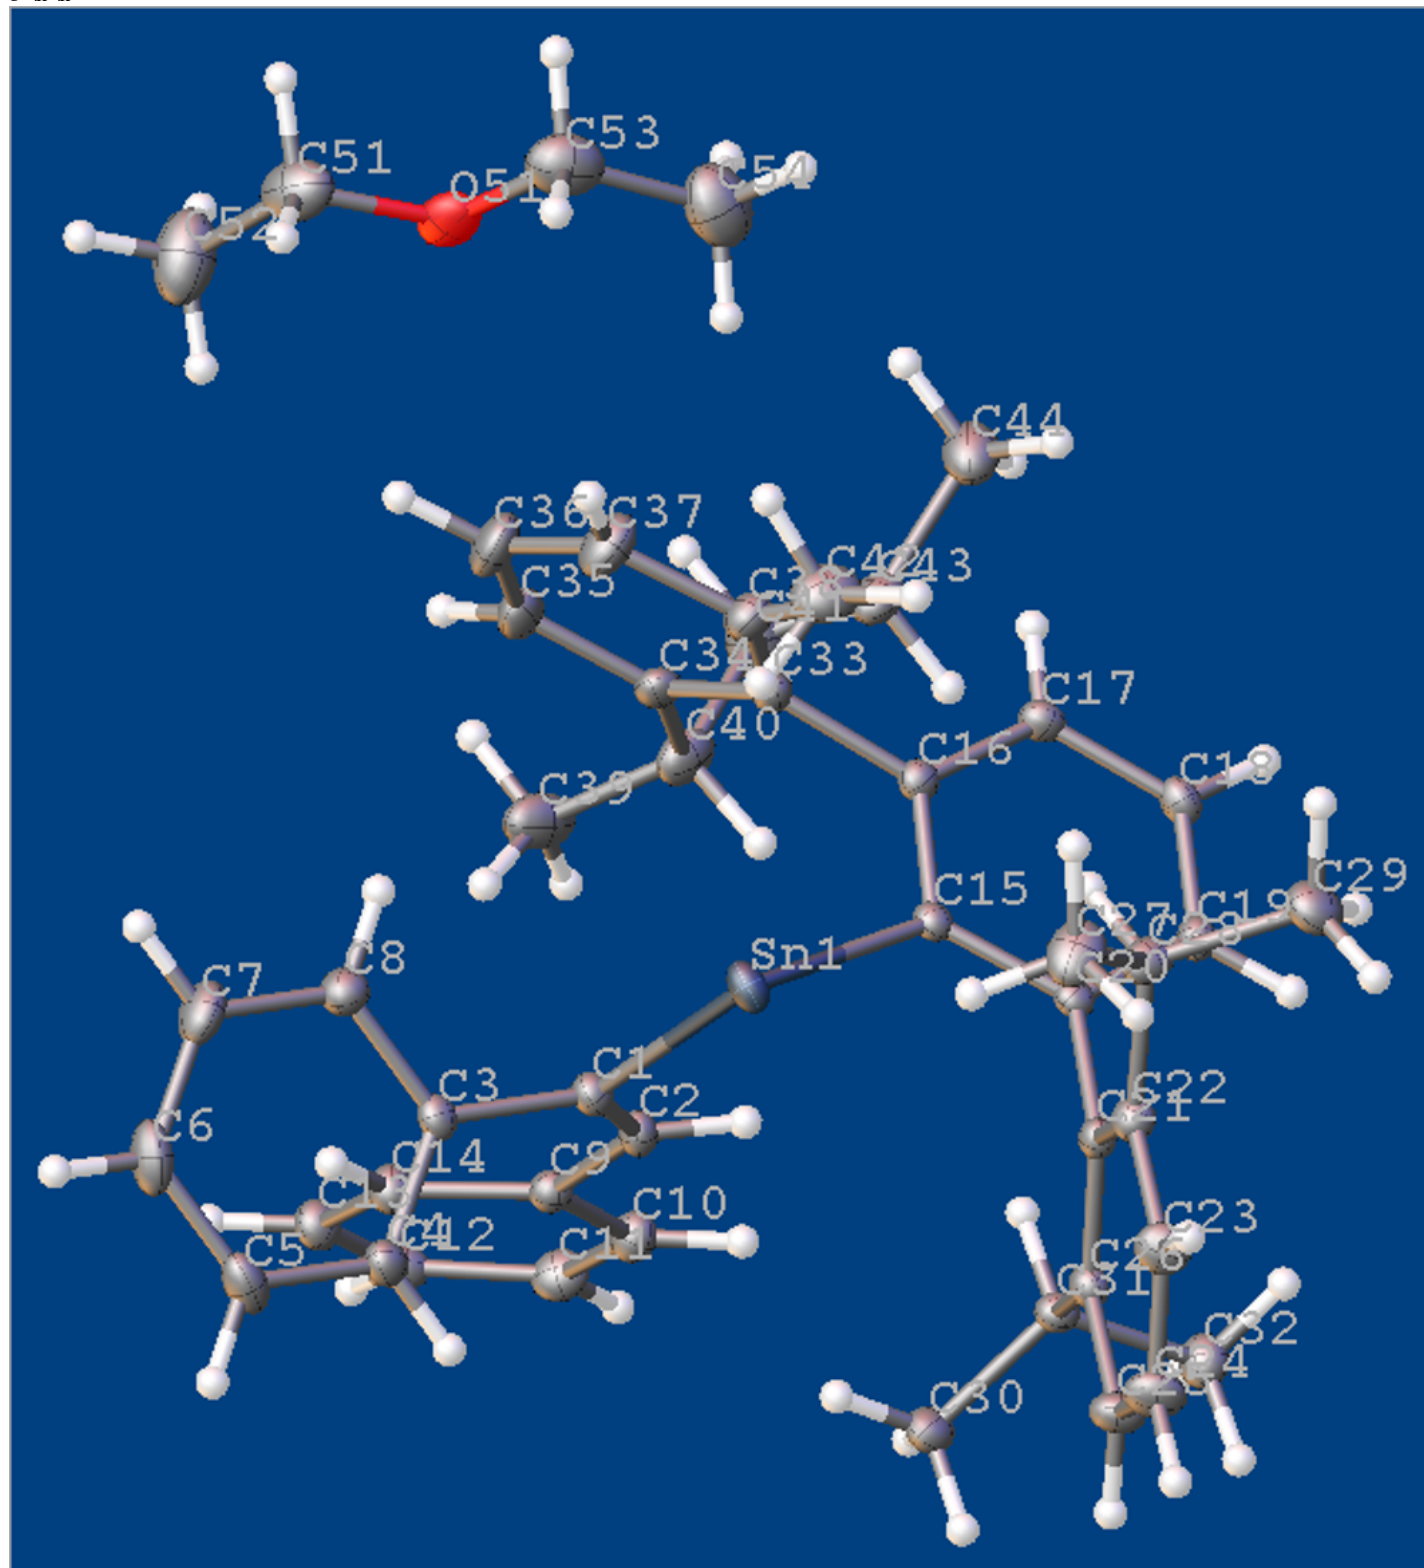

\n "

**Table 1** Crystal data and structure refinement for WZ14FMI.

|                     |                                                     |
|---------------------|-----------------------------------------------------|
| Identification code | WZ14FMI                                             |
| Empirical formula   | C <sub>46</sub> H <sub>53</sub> O <sub>0.5</sub> Sn |
| Formula weight      | 732.57                                              |
| Temperature/K       | 90.15                                               |
| Crystal system      | triclinic                                           |
| Space group         | P-1                                                 |
| a/Å                 | 9.6825(11)                                          |
| b/Å                 | 11.7854(13)                                         |
| c/Å                 | 18.190(2)                                           |
| $\alpha$ /°         | 90.3576(17)                                         |
| $\beta$ /°          | 100.7821(17)                                        |

|                                               |                                                                |
|-----------------------------------------------|----------------------------------------------------------------|
| $\gamma/^\circ$                               | 107.7753(15)                                                   |
| Volume/ $\text{\AA}^3$                        | 1937.2(4)                                                      |
| Z                                             | 2                                                              |
| $\rho_{\text{calc}}/\text{g/cm}^3$            | 1.256                                                          |
| $\mu/\text{mm}^{-1}$                          | 0.691                                                          |
| F(000)                                        | 766.0                                                          |
| Crystal size/ $\text{mm}^3$                   | $0.381 \times 0.331 \times 0.266$                              |
| Radiation                                     | MoK $\alpha$ ( $\lambda = 0.71073$ )                           |
| $2\theta$ range for data collection/ $^\circ$ | 4.424 to 61.496                                                |
| Index ranges                                  | $-13 \leq h \leq 13, -16 \leq k \leq 16, -26 \leq l \leq 26$   |
| Reflections collected                         | 23310                                                          |
| Independent reflections                       | 11955 [ $R_{\text{int}} = 0.0183, R_{\text{sigma}} = 0.0273$ ] |
| Data/restraints/parameters                    | 11955/9/459                                                    |
| Goodness-of-fit on $F^2$                      | 1.044                                                          |
| Final R indexes [ $I \geq 2\sigma(I)$ ]       | $R_1 = 0.0252, wR_2 = 0.0613$                                  |
| Final R indexes [all data]                    | $R_1 = 0.0289, wR_2 = 0.0632$                                  |
| Largest diff. peak/hole / $e \text{\AA}^{-3}$ | 0.54/-0.27                                                     |

**Table 2 Fractional Atomic Coordinates ( $\times 10^4$ ) and Equivalent Isotropic Displacement Parameters ( $\text{\AA}^2 \times 10^3$ ) for WZ14FMI.  $U_{\text{eq}}$  is defined as 1/3 of the trace of the orthogonalised  $U_{\text{IJ}}$  tensor.**

| Atom | x           | y           | z          | U(eq)    |
|------|-------------|-------------|------------|----------|
| Sn1  | 7083.0(2)   | 3576.3(2)   | 7180.3(2)  | 17.54(3) |
| C15  | 5304.5(13)  | 2422.1(10)  | 7686.9(7)  | 13.8(2)  |
| C20  | 5531.5(13)  | 1523.0(10)  | 8151.3(7)  | 13.6(2)  |
| C19  | 4325.7(14)  | 689.3(11)   | 8362.5(7)  | 15.6(2)  |
| C18  | 2896.8(14)  | 731.4(11)   | 8101.9(7)  | 16.7(2)  |
| C17  | 2654.5(14)  | 1599.2(11)  | 7621.2(7)  | 16.9(2)  |
| C16  | 3853.8(14)  | 2440.9(11)  | 7410.5(7)  | 14.9(2)  |
| C21  | 7047.7(13)  | 1396.9(10)  | 8375.3(7)  | 13.9(2)  |
| C26  | 7935.5(14)  | 1839.1(11)  | 9087.8(7)  | 15.5(2)  |
| C25  | 9317.6(14)  | 1661.0(13)  | 9278.3(8)  | 20.8(3)  |
| C24  | 9808.9(15)  | 1047.3(14)  | 8786.2(8)  | 24.2(3)  |
| C23  | 8936.7(15)  | 611.7(13)   | 8083.2(8)  | 21.4(3)  |
| C22  | 7558.2(14)  | 784.4(11)   | 7864.0(7)  | 16.7(2)  |
| C31  | 7411.4(14)  | 2460.8(11)  | 9663.6(7)  | 15.8(2)  |
| C30  | 8566.9(16)  | 3646.0(12)  | 9988.5(8)  | 22.4(3)  |
| C32  | 7004.9(16)  | 1633.9(13)  | 10292.4(8) | 22.0(3)  |
| C28  | 6610.8(16)  | 266.7(12)   | 7099.3(7)  | 20.5(2)  |
| C29  | 5754.9(18)  | -1055.4(13) | 7126.0(9)  | 28.2(3)  |
| C27  | 7518(2)     | 453.0(15)   | 6476.5(8)  | 31.0(3)  |
| C33  | 3648.1(14)  | 3321.4(11)  | 6836.6(7)  | 16.6(2)  |
| C38  | 3798.3(16)  | 3081.2(13)  | 6095.6(8)  | 22.0(3)  |
| C37  | 3738(2)     | 3938.6(15)  | 5573.8(9)  | 31.6(3)  |
| C36  | 3497.5(19)  | 4990.2(15)  | 5768.6(9)  | 31.6(3)  |
| C35  | 3299.6(16)  | 5199.7(13)  | 6481.9(9)  | 25.2(3)  |
| C34  | 3365.0(14)  | 4379.3(12)  | 7027.9(8)  | 19.5(2)  |
| C43  | 3853.7(18)  | 1862.5(13)  | 5840.4(8)  | 25.8(3)  |
| C44  | 2267(2)     | 1016.4(15)  | 5578.8(9)  | 33.1(3)  |
| C42  | 4770(2)     | 1905.5(16)  | 5236.9(9)  | 32.8(3)  |
| C40  | 3077.8(18)  | 4617.3(14)  | 7798.6(8)  | 27.0(3)  |
| C41  | 1424(2)     | 4116.2(16)  | 7810.4(12) | 40.5(4)  |
| C39  | 3627(2)     | 5946.7(15)  | 8060.2(10) | 36.4(4)  |
| C1   | 7544.0(14)  | 5234.8(11)  | 7874.3(7)  | 16.4(2)  |
| C2   | 7045.6(14)  | 5251.3(11)  | 8518.2(7)  | 16.7(2)  |
| C9   | 7099.4(14)  | 6260.3(11)  | 9021.1(7)  | 16.2(2)  |
| C14  | 7459.8(15)  | 7453.6(12)  | 8833.3(7)  | 19.0(2)  |
| C13  | 7276.7(15)  | 8326.3(12)  | 9289.0(8)  | 20.5(2)  |
| C12  | 6764.0(15)  | 8039.4(12)  | 9948.7(8)  | 20.6(3)  |
| C11  | 6454.4(16)  | 6873.7(13)  | 10159.5(8) | 22.9(3)  |
| C10  | 6609.2(15)  | 5994.5(12)  | 9698.1(8)  | 20.4(2)  |
| C3   | 8452.4(14)  | 6282.6(11)  | 7547.2(7)  | 15.2(2)  |
| C8   | 7868.7(16)  | 6683.0(12)  | 6874.7(8)  | 21.3(3)  |
| C7   | 8746.2(19)  | 7624.5(13)  | 6546.7(8)  | 28.1(3)  |
| C6   | 10221.5(18) | 8162.9(13)  | 6871.1(9)  | 28.8(3)  |
| C5   | 10822.1(16) | 7751.8(12)  | 7528.3(9)  | 25.0(3)  |
| C4   | 9950.8(15)  | 6824.4(11)  | 7865.0(8)  | 19.7(2)  |
| O51  | 217(3)      | 5108(4)     | 5086(3)    | 29.2(8)  |
| C51  | 640(4)      | 6066(3)     | 4623.8(19) | 37.1(8)  |
| C52  | 921(5)      | 7233(4)     | 5061(3)    | 49.8(12) |
| C53  | -61(4)      | 3970(3)     | 4747(2)    | 38.4(8)  |
| C54  | -491(5)     | 3058(4)     | 5315(3)    | 46.3(10) |

**Table 3 Anisotropic Displacement Parameters ( $\text{\AA}^2 \times 10^3$ ) for WZ14FMI. The Anisotropic displacement factor exponent takes the form:**

$$-2\pi^2[h^2a^{*2}U_{11}+2hka^*b^*U_{12}+\dots].$$

| Atom | U <sub>11</sub> | U <sub>22</sub> | U <sub>33</sub> | U <sub>23</sub> | U <sub>13</sub> | U <sub>12</sub> |
|------|-----------------|-----------------|-----------------|-----------------|-----------------|-----------------|
| Sn1  | 18.33(5)        | 13.28(4)        | 20.14(5)        | -1.72(3)        | 8.28(3)         | 1.05(3)         |
| C15  | 14.5(5)         | 12.6(5)         | 13.0(5)         | -1.1(4)         | 2.3(4)          | 2.6(4)          |
| C20  | 14.4(5)         | 12.7(5)         | 12.7(5)         | -1.7(4)         | 1.9(4)          | 3.2(4)          |
| C19  | 19.1(6)         | 13.8(5)         | 13.8(5)         | 1.0(4)          | 4.2(4)          | 4.3(4)          |
| C18  | 16.1(5)         | 14.7(5)         | 19.0(6)         | 0.1(4)          | 6.7(4)          | 2.5(4)          |
| C17  | 13.9(5)         | 17.6(6)         | 18.7(6)         | -0.7(4)         | 2.4(4)          | 4.9(4)          |
| C16  | 16.4(5)         | 13.3(5)         | 15.2(5)         | -0.2(4)         | 3.0(4)          | 5.1(4)          |
| C21  | 14.0(5)         | 13.0(5)         | 14.8(5)         | 2.1(4)          | 3.6(4)          | 4.0(4)          |
| C26  | 15.4(5)         | 14.5(5)         | 16.1(5)         | 1.0(4)          | 4.3(4)          | 3.4(4)          |
| C25  | 15.2(6)         | 25.6(6)         | 19.7(6)         | -2.6(5)         | 0.4(5)          | 5.6(5)          |
| C24  | 14.7(6)         | 32.1(7)         | 26.7(7)         | -2.9(6)         | 3.1(5)          | 9.3(5)          |
| C23  | 18.2(6)         | 25.9(7)         | 22.6(6)         | -1.4(5)         | 7.6(5)          | 8.5(5)          |
| C22  | 18.7(6)         | 17.2(6)         | 15.0(5)         | 1.2(4)          | 4.3(4)          | 5.9(5)          |
| C31  | 16.1(5)         | 16.1(5)         | 14.5(5)         | -1.3(4)         | 1.6(4)          | 5.1(4)          |
| C30  | 25.0(7)         | 17.4(6)         | 21.5(6)         | -2.8(5)         | -1.1(5)         | 5.1(5)          |
| C32  | 25.8(7)         | 22.1(6)         | 19.3(6)         | 2.1(5)          | 8.2(5)          | 6.8(5)          |
| C28  | 26.2(7)         | 20.9(6)         | 16.0(6)         | -2.2(5)         | 1.7(5)          | 11.3(5)         |
| C29  | 29.5(7)         | 23.7(7)         | 27.4(7)         | -5.6(6)         | 1.8(6)          | 5.2(6)          |
| C27  | 48.4(10)        | 30.5(8)         | 18.7(6)         | 0.1(6)          | 10.4(6)         | 16.6(7)         |
| C33  | 14.5(5)         | 15.3(5)         | 18.7(6)         | 3.2(4)          | 1.5(4)          | 3.9(4)          |
| C38  | 24.9(6)         | 22.8(6)         | 19.1(6)         | 4.4(5)          | 3.1(5)          | 9.3(5)          |
| C37  | 42.7(9)         | 34.7(8)         | 23.5(7)         | 11.0(6)         | 9.3(6)          | 19.4(7)         |
| C36  | 36.5(8)         | 29.7(8)         | 33.3(8)         | 16.9(6)         | 8.7(7)          | 15.9(7)         |
| C35  | 23.3(7)         | 19.7(6)         | 33.1(8)         | 6.1(5)          | 1.3(6)          | 9.7(5)          |
| C34  | 15.5(5)         | 19.1(6)         | 22.7(6)         | 1.7(5)          | -0.8(5)         | 6.4(5)          |
| C43  | 37.5(8)         | 25.3(7)         | 15.6(6)         | 0.5(5)          | 1.3(5)          | 13.7(6)         |
| C44  | 44.8(9)         | 28.0(8)         | 23.4(7)         | 0.8(6)          | 5.3(7)          | 7.8(7)          |
| C42  | 38.2(9)         | 39.5(9)         | 23.0(7)         | -5.4(6)         | 3.7(6)          | 17.1(7)         |
| C40  | 34.8(8)         | 26.4(7)         | 25.6(7)         | 0.2(6)          | 3.0(6)          | 19.5(6)         |
| C41  | 46.7(10)        | 29.1(8)         | 56.5(11)        | 3.0(8)          | 28.4(9)         | 16.5(8)         |
| C39  | 38.1(9)         | 33.9(8)         | 39.4(9)         | -10.5(7)        | -6.3(7)         | 22.9(7)         |
| C1   | 16.7(5)         | 13.7(5)         | 17.9(6)         | 0.1(4)          | 3.2(4)          | 3.4(4)          |
| C2   | 18.0(6)         | 13.2(5)         | 19.1(6)         | 2.5(4)          | 4.6(4)          | 4.3(4)          |
| C9   | 15.9(5)         | 16.6(5)         | 16.2(5)         | 0.7(4)          | 2.9(4)          | 5.6(4)          |
| C14  | 22.6(6)         | 17.3(6)         | 17.4(6)         | 0.9(4)          | 5.4(5)          | 5.7(5)          |
| C13  | 23.0(6)         | 17.2(6)         | 21.2(6)         | -0.8(5)         | 4.3(5)          | 6.1(5)          |
| C12  | 19.7(6)         | 23.8(6)         | 19.1(6)         | -4.6(5)         | 2.5(5)          | 8.8(5)          |
| C11  | 24.4(7)         | 29.6(7)         | 17.0(6)         | 1.6(5)          | 6.7(5)          | 10.0(6)         |
| C10  | 21.6(6)         | 20.9(6)         | 20.2(6)         | 4.4(5)          | 6.8(5)          | 7.2(5)          |
| C3   | 17.5(5)         | 12.1(5)         | 16.4(5)         | -0.8(4)         | 5.4(4)          | 3.9(4)          |
| C8   | 23.7(6)         | 20.9(6)         | 18.3(6)         | 0.8(5)          | 2.2(5)          | 6.8(5)          |
| C7   | 42.2(9)         | 24.5(7)         | 20.9(7)         | 8.4(5)          | 10.1(6)         | 12.8(6)         |
| C6   | 37.3(8)         | 17.9(6)         | 35.9(8)         | 6.9(6)          | 21.8(7)         | 6.5(6)          |
| C5   | 20.1(6)         | 16.4(6)         | 38.6(8)         | 0.0(5)          | 10.4(6)         | 3.0(5)          |
| C4   | 19.0(6)         | 15.1(5)         | 23.8(6)         | 0.5(5)          | 2.3(5)          | 4.6(5)          |
| O51  | 16(2)           | 40.3(19)        | 35(3)           | 10.3(16)        | 8.1(17)         | 11.6(17)        |
| C51  | 30.5(16)        | 53(2)           | 28.7(16)        | 9.8(15)         | 10.4(13)        | 11.1(15)        |
| C52  | 75(4)           | 39(2)           | 48(3)           | 12(2)           | 32(2)           | 25(2)           |
| C53  | 32.3(17)        | 47(2)           | 39.9(19)        | -6.7(15)        | 4.7(14)         | 19.2(15)        |
| C54  | 48(2)           | 34(2)           | 60(3)           | -3(2)           | 18(2)           | 13.1(18)        |

**Table 4 Bond Lengths for WZ14FMI.**

| Atom | Atom | Length/Å   | Atom | Atom | Length/Å   |
|------|------|------------|------|------|------------|
| Sn1  | C15  | 2.2009(12) | C36  | C35  | 1.378(2)   |
| Sn1  | C1   | 2.1999(13) | C35  | C34  | 1.3967(19) |
| C15  | C20  | 1.4030(16) | C34  | C40  | 1.520(2)   |
| C15  | C16  | 1.4076(17) | C43  | C44  | 1.538(2)   |
| C20  | C19  | 1.3957(17) | C43  | C42  | 1.527(2)   |
| C20  | C21  | 1.5012(17) | C40  | C41  | 1.532(2)   |
| C19  | C18  | 1.3922(18) | C40  | C39  | 1.533(2)   |
| C18  | C17  | 1.3951(18) | C1   | C2   | 1.3497(17) |
| C17  | C16  | 1.3955(17) | C1   | C3   | 1.4814(17) |
| C16  | C33  | 1.5060(17) | C2   | C9   | 1.4779(18) |
| C21  | C26  | 1.4112(17) | C9   | C14  | 1.4026(18) |
| C21  | C22  | 1.4183(17) | C9   | C10  | 1.4045(18) |
| C26  | C25  | 1.3978(18) | C14  | C13  | 1.3900(18) |
| C26  | C31  | 1.5190(17) | C13  | C12  | 1.3879(19) |
| C25  | C24  | 1.3827(19) | C12  | C11  | 1.386(2)   |
| C24  | C23  | 1.391(2)   | C11  | C10  | 1.3899(19) |
| C23  | C22  | 1.3963(18) | C3   | C8   | 1.3964(18) |
| C22  | C28  | 1.5229(18) | C3   | C4   | 1.4010(18) |
| C31  | C30  | 1.5297(18) | C8   | C7   | 1.390(2)   |
| C31  | C32  | 1.5365(18) | C7   | C6   | 1.385(2)   |
| C28  | C29  | 1.531(2)   | C6   | C5   | 1.386(2)   |
| C28  | C27  | 1.536(2)   | C5   | C4   | 1.3857(19) |
| C33  | C38  | 1.4184(19) | O51  | C51  | 1.418(6)   |
| C33  | C34  | 1.4105(18) | O51  | C53  | 1.400(5)   |
| C38  | C37  | 1.397(2)   | C51  | C52  | 1.509(5)   |
| C38  | C43  | 1.526(2)   | C53  | C54  | 1.516(5)   |
| C37  | C36  | 1.384(2)   |      |      |            |

**Table 5 Bond Angles for WZ14FMI.**

| Atom Atom Atom | Angle/°    | Atom Atom Atom | Angle/°    |
|----------------|------------|----------------|------------|
| C1 Sn1 C15     | 98.57(5)   | C37 C38 C43    | 119.72(13) |
| C20 C15 Sn1    | 121.71(9)  | C36 C37 C38    | 120.83(15) |
| C20 C15 C16    | 119.54(11) | C35 C36 C37    | 120.16(14) |
| C16 C15 Sn1    | 117.48(8)  | C36 C35 C34    | 121.40(14) |
| C15 C20 C21    | 120.34(10) | C33 C34 C40    | 121.54(12) |
| C19 C20 C15    | 119.82(11) | C35 C34 C33    | 118.54(13) |
| C19 C20 C21    | 119.68(11) | C35 C34 C40    | 119.89(12) |
| C18 C19 C20    | 120.29(11) | C38 C43 C44    | 109.35(13) |
| C19 C18 C17    | 120.35(11) | C38 C43 C42    | 114.08(13) |
| C18 C17 C16    | 119.78(12) | C42 C43 C44    | 110.96(13) |
| C15 C16 C33    | 117.67(11) | C34 C40 C41    | 110.69(13) |
| C17 C16 C15    | 120.17(11) | C34 C40 C39    | 113.16(14) |
| C17 C16 C33    | 121.95(11) | C41 C40 C39    | 108.95(13) |
| C26 C21 C20    | 121.17(11) | C2 C1 Sn1      | 122.34(9)  |
| C26 C21 C22    | 120.22(11) | C2 C1 C3       | 126.03(11) |
| C22 C21 C20    | 118.58(11) | C3 C1 Sn1      | 111.63(8)  |
| C21 C26 C31    | 122.03(11) | C1 C2 C9       | 130.92(12) |
| C25 C26 C21    | 118.87(11) | C14 C9 C2      | 124.26(11) |
| C25 C26 C31    | 119.06(11) | C14 C9 C10     | 117.58(12) |
| C24 C25 C26    | 121.09(12) | C10 C9 C2      | 117.81(11) |
| C25 C24 C23    | 120.14(13) | C13 C14 C9     | 120.77(12) |
| C24 C23 C22    | 120.78(12) | C12 C13 C14    | 120.64(13) |
| C21 C22 C28    | 121.54(11) | C11 C12 C13    | 119.53(12) |
| C23 C22 C21    | 118.88(12) | C12 C11 C10    | 119.96(13) |
| C23 C22 C28    | 119.52(11) | C11 C10 C9     | 121.46(13) |
| C26 C31 C30    | 111.88(11) | C8 C3 C1       | 120.48(12) |
| C26 C31 C32    | 110.24(10) | C8 C3 C4       | 118.33(12) |
| C30 C31 C32    | 110.61(11) | C4 C3 C1       | 120.92(11) |
| C22 C28 C29    | 110.90(11) | C7 C8 C3       | 120.46(13) |
| C22 C28 C27    | 112.44(12) | C6 C7 C8       | 120.65(14) |
| C29 C28 C27    | 111.09(12) | C7 C6 C5       | 119.35(13) |
| C38 C33 C16    | 118.09(11) | C4 C5 C6       | 120.42(14) |
| C34 C33 C16    | 121.60(12) | C5 C4 C3       | 120.76(13) |
| C34 C33 C38    | 120.26(12) | C53 O51 C51    | 115.1(5)   |
| C33 C38 C43    | 121.21(12) | O51 C51 C52    | 109.5(3)   |
| C37 C38 C33    | 118.72(13) | O51 C53 C54    | 108.2(4)   |

**Table 6 Torsion Angles for WZ14FMI.**

| A   | B   | C   | D   | Angle/°     | A   | B   | C   | D   | Angle/°     |
|-----|-----|-----|-----|-------------|-----|-----|-----|-----|-------------|
| Sn1 | C15 | C20 | C19 | -169.67(9)  | C23 | C22 | C28 | C29 | 81.96(16)   |
| Sn1 | C15 | C20 | C21 | 5.75(15)    | C23 | C22 | C28 | C27 | -43.10(17)  |
| Sn1 | C15 | C16 | C17 | 169.86(9)   | C22 | C21 | C26 | C25 | -0.08(18)   |
| Sn1 | C15 | C16 | C33 | -4.96(14)   | C22 | C21 | C26 | C31 | -177.76(11) |
| Sn1 | C1  | C2  | C9  | -173.17(10) | C31 | C26 | C25 | C24 | 176.76(13)  |
| Sn1 | C1  | C3  | C8  | 67.82(13)   | C33 | C38 | C37 | C36 | -1.6(2)     |
| Sn1 | C1  | C3  | C4  | -106.20(12) | C33 | C38 | C43 | C44 | 85.23(16)   |
| C15 | C20 | C19 | C18 | 1.32(18)    | C33 | C38 | C43 | C42 | -149.87(13) |
| C15 | C20 | C21 | C26 | 100.78(14)  | C33 | C34 | C40 | C41 | -89.23(16)  |
| C15 | C20 | C21 | C22 | -81.34(15)  | C33 | C34 | C40 | C39 | 148.14(13)  |
| C15 | C16 | C33 | C38 | 73.88(15)   | C38 | C33 | C34 | C35 | -2.65(19)   |
| C15 | C16 | C33 | C34 | -103.93(14) | C38 | C33 | C34 | C40 | 175.09(13)  |
| C20 | C15 | C16 | C17 | 2.53(18)    | C38 | C37 | C36 | C35 | -0.7(3)     |
| C20 | C15 | C16 | C33 | -172.29(11) | C37 | C38 | C43 | C44 | -87.97(17)  |
| C20 | C19 | C18 | C17 | 0.66(19)    | C37 | C38 | C43 | C42 | 36.9(2)     |
| C20 | C21 | C26 | C25 | 177.76(11)  | C37 | C36 | C35 | C34 | 1.3(2)      |
| C20 | C21 | C26 | C31 | 0.07(18)    | C36 | C35 | C34 | C33 | 0.3(2)      |
| C20 | C21 | C22 | C23 | -176.84(12) | C36 | C35 | C34 | C40 | -177.46(14) |
| C20 | C21 | C22 | C28 | 0.42(17)    | C35 | C34 | C40 | C41 | 88.48(16)   |
| C19 | C20 | C21 | C26 | -83.78(15)  | C35 | C34 | C40 | C39 | -34.16(18)  |
| C19 | C20 | C21 | C22 | 94.09(14)   | C34 | C33 | C38 | C37 | 3.3(2)      |
| C19 | C18 | C17 | C16 | -1.03(19)   | C34 | C33 | C38 | C43 | -169.97(13) |
| C18 | C17 | C16 | C15 | -0.57(18)   | C43 | C38 | C37 | C36 | 171.73(15)  |
| C18 | C17 | C16 | C33 | 174.02(12)  | C1  | C2  | C9  | C14 | 13.1(2)     |
| C17 | C16 | C33 | C38 | -100.84(15) | C1  | C2  | C9  | C10 | -173.91(14) |
| C17 | C16 | C33 | C34 | 81.35(16)   | C1  | C3  | C8  | C7  | -176.45(13) |
| C16 | C15 | C20 | C19 | -2.90(17)   | C1  | C3  | C4  | C5  | 175.54(12)  |
| C16 | C15 | C20 | C21 | 172.53(11)  | C2  | C1  | C3  | C8  | -112.63(15) |
| C16 | C33 | C38 | C37 | -174.54(13) | C2  | C1  | C3  | C4  | 73.35(18)   |
| C16 | C33 | C38 | C43 | 12.19(19)   | C2  | C9  | C14 | C13 | 170.45(12)  |
| C16 | C33 | C34 | C35 | 175.12(12)  | C2  | C9  | C10 | C11 | -172.14(12) |
| C16 | C33 | C34 | C40 | -7.14(19)   | C9  | C14 | C13 | C12 | 1.4(2)      |
| C21 | C20 | C19 | C18 | -174.14(11) | C14 | C9  | C10 | C11 | 1.3(2)      |
| C21 | C26 | C25 | C24 | -1.0(2)     | C14 | C13 | C12 | C11 | 1.0(2)      |
| C21 | C26 | C31 | C30 | -130.59(12) | C13 | C12 | C11 | C10 | -2.2(2)     |
| C21 | C26 | C31 | C32 | 105.89(13)  | C12 | C11 | C10 | C9  | 1.0(2)      |
| C21 | C22 | C28 | C29 | -95.29(15)  | C10 | C9  | C14 | C13 | -2.58(19)   |
| C21 | C22 | C28 | C27 | 139.65(13)  | C3  | C1  | C2  | C9  | 7.3(2)      |
| C26 | C21 | C22 | C23 | 1.05(18)    | C3  | C8  | C7  | C6  | 1.5(2)      |
| C26 | C21 | C22 | C28 | 178.32(12)  | C8  | C3  | C4  | C5  | 1.39(19)    |
| C26 | C25 | C24 | C23 | 1.1(2)      | C8  | C7  | C6  | C5  | 0.2(2)      |
| C25 | C26 | C31 | C30 | 51.74(16)   | C7  | C6  | C5  | C4  | -1.1(2)     |
| C25 | C26 | C31 | C32 | -71.79(15)  | C6  | C5  | C4  | C3  | 0.3(2)      |
| C25 | C24 | C23 | C22 | -0.1(2)     | C4  | C3  | C8  | C7  | -2.3(2)     |
| C24 | C23 | C22 | C21 | -1.0(2)     | C51 | O51 | C53 | C54 | 179.8(2)    |
| C24 | C23 | C22 | C28 | -178.30(13) | C53 | O51 | C51 | C52 | -179.30(18) |

**Table 7 Hydrogen Atom Coordinates ( $\text{\AA}\times 10^4$ ) and Isotropic Displacement Parameters ( $\text{\AA}^2\times 10^3$ ) for WZ14FMI.**

| Atom | x        | y        | z        | U(eq) |
|------|----------|----------|----------|-------|
| H19  | 4480.79  | 90.55    | 8685.42  | 19    |
| H18  | 2082.38  | 166.23   | 8252.25  | 20    |
| H17  | 1676.48  | 1617.07  | 7438.01  | 20    |
| H25  | 9929.41  | 1966.67  | 9753.63  | 25    |
| H24  | 10744.17 | 922.81   | 8928.59  | 29    |
| H23  | 9283.04  | 191.85   | 7748.31  | 26    |
| H31  | 6498.27  | 2635.27  | 9406.72  | 19    |
| H30A | 9464.47  | 3495.06  | 10255.56 | 34    |
| H30B | 8170.34  | 4038.41  | 10337.57 | 34    |
| H30C | 8806.12  | 4163.82  | 9580.55  | 34    |
| H32A | 6254.43  | 884.79   | 10074.85 | 33    |
| H32B | 6611.31  | 2025.35  | 10643.39 | 33    |
| H32C | 7889.59  | 1464.25  | 10559.86 | 33    |
| H28  | 5866.65  | 701.6    | 6972.44  | 25    |
| H29A | 6454.36  | -1509.21 | 7248.08  | 42    |
| H29B | 5112.5   | -1357.67 | 6636.43  | 42    |
| H29C | 5149.9   | -1145.52 | 7510.76  | 42    |
| H27A | 8103.06  | 1296.78  | 6491.92  | 47    |
| H27B | 6847.3   | 217.86   | 5987.53  | 47    |
| H27C | 8182.14  | -36.89   | 6552.7   | 47    |
| H37  | 3862.53  | 3798.08  | 5079.26  | 38    |
| H36  | 3469.21  | 5568.86  | 5409.57  | 38    |
| H35  | 3114.71  | 5917.32  | 6604.9   | 30    |
| H43  | 4322.49  | 1527.64  | 6288.09  | 31    |
| H44A | 1727.16  | 950.3    | 5989.73  | 50    |
| H44B | 2300.22  | 225.64   | 5430.65  | 50    |
| H44C | 1764.06  | 1334.21  | 5149.5   | 50    |
| H42A | 4270.54  | 2134.23  | 4768.53  | 49    |
| H42B | 4876.12  | 1116.49  | 5154.39  | 49    |
| H42C | 5750.54  | 2493.51  | 5400.42  | 49    |
| H40  | 3614.62  | 4193.61  | 8166.55  | 32    |
| H41A | 872.95   | 4516.61  | 7451.84  | 61    |
| H41B | 1265.51  | 4255.16  | 8315.42  | 61    |
| H41C | 1076.76  | 3256.52  | 7671.67  | 61    |
| H39A | 4637.09  | 6304.26  | 7977.52  | 55    |
| H39B | 3620.7   | 6033.69  | 8595.62  | 55    |
| H39C | 2975.4   | 6351.79  | 7774.8   | 55    |
| H2   | 6581.68  | 4484.53  | 8674.56  | 20    |
| H14  | 7833.4   | 7667.85  | 8389.44  | 23    |
| H13  | 7504.76  | 9126.99  | 9147.47  | 25    |
| H12  | 6626.21  | 8637.44  | 10253.64 | 25    |
| H11  | 6136.6   | 6676.17  | 10619.08 | 28    |
| H10  | 6378.33  | 5196.06  | 9843.88  | 24    |
| H8   | 6864.69  | 6309.16  | 6639.71  | 26    |
| H7   | 8329.84  | 7901.57  | 6095.56  | 34    |
| H6   | 10816.01 | 8807.56  | 6645.4   | 35    |
| H5   | 11837.47 | 8108.16  | 7749.28  | 30    |
| H4   | 10374.42 | 6552.88  | 8316.48  | 24    |
| H51A | -155.44  | 5976.95  | 4176.89  | 45    |
| H51B | 1547.53  | 6056.85  | 4451.21  | 45    |
| H52A | 1213.85  | 7895.62  | 4740.96  | 75    |
| H52B | 17.22    | 7241.69  | 5226.13  | 75    |
| H52C | 1716.08  | 7321.41  | 5499.79  | 75    |
| H53A | 834.52   | 3912.01  | 4581.85  | 46    |
| H53B | -873.29  | 3818.51  | 4301.7   | 46    |
| H54A | -689.97  | 2253.99  | 5087.86  | 70    |
| H54B | 321.39   | 3212.26  | 5752.59  | 70    |
| H54C | -1380.49 | 3119.09  | 5473.42  | 70    |



**Table 8 Atomic Occupancy for WZ14FMI.**

| Atom | Occupancy | Atom | Occupancy | Atom | Occupancy |
|------|-----------|------|-----------|------|-----------|
| O51  | 0.5       | C51  | 0.5       | H51A | 0.5       |
| H51B | 0.5       | C52  | 0.5       | H52A | 0.5       |
| H52B | 0.5       | H52C | 0.5       | C53  | 0.5       |
| H53A | 0.5       | H53B | 0.5       | C54  | 0.5       |
| H54A | 0.5       | H54B | 0.5       | H54C | 0.5       |

**Experimental**

Single crystals of  $C_{46}H_{53}O_{0.5}Sn$  [WZ14FMI] were [1]. A suitable crystal was selected and [1] on a **Bruker APEX-II CCD** diffractometer. The crystal was kept at 90.15 K during data collection. Using Olex2 [1], the structure was solved with the olex2.solve [2] structure solution program using Charge Flipping and refined with the SHELXL [3] refinement package using Least Squares minimisation.

1. Dolomanov, O.V., Bourhis, L.J., Gildea, R.J., Howard, J.A.K. & Puschmann, H. (2009), *J. Appl. Cryst.* 42, 339-341.
2. Bourhis, L.J., Dolomanov, O.V., Gildea, R.J., Howard, J.A.K., Puschmann, H. (2015). *Acta Cryst.* A71, 59-75.
3. Sheldrick, G.M. (2015). *Acta Cryst.* C71, 3-8.

**Crystal structure determination of [WZ14FMI]**

**Crystal Data** for  $C_{46}H_{53}O_{0.5}Sn$  ( $M = 732.57$  g/mol): triclinic, space group P-1 (no. 2),  $a = 9.6825(11)$  Å,  $b = 11.7854(13)$  Å,  $c = 18.190(2)$  Å,  $\alpha = 90.3576(17)^\circ$ ,  $\beta = 100.7821(17)^\circ$ ,  $\gamma = 107.7753(15)^\circ$ ,  $V = 1937.2(4)$  Å<sup>3</sup>,  $Z = 2$ ,  $T = 90.15$  K,  $\mu(\text{MoK}\alpha) = 0.691$  mm<sup>-1</sup>,  $D_{\text{calc}} = 1.256$  g/cm<sup>3</sup>, 23310 reflections measured ( $4.424^\circ \leq 2\theta \leq 61.496^\circ$ ), 11955 unique ( $R_{\text{int}} = 0.0183$ ,  $R_{\text{sigma}} = 0.0273$ ) which were used in all calculations. The final  $R_1$  was 0.0252 ( $I > 2\sigma(I)$ ) and  $wR_2$  was 0.0632 (all data).

**Refinement model description**

Number of restraints - 9, number of constraints - unknown.

Details:

## 1. Fixed Uiso

At 1.2 times of:

All C(H) groups, All C(H,H) groups

At 1.5 times of:

All C(H,H,H) groups

## 2. Restrained distances

O51-C51 = O51-C53

1.45 with sigma of 0.01

C51-C52 = C53-C54

1.5 with sigma of 0.01

C51-C53

2.4 with sigma of 0.01

O51-C52 = O51-C54

2.45 with sigma of 0.01

## 3. Restrained planarity

O51, C51, C52, C53, C54

with sigma of 0.01

## 4. Others

Fixed Sof: O51(0.5) C51(0.5) H51A(0.5) H51B(0.5) C52(0.5) H52A(0.5) H52B(0.5)

H52C(0.5) C53(0.5) H53A(0.5) H53B(0.5) C54(0.5) H54A(0.5) H54B(0.5) H54C(0.5)

## 5.a Ternary CH refined with riding coordinates:

C31(H31), C28(H28), C43(H43), C40(H40)

## 5.b Secondary CH2 refined with riding coordinates:

C51(H51A,H51B), C53(H53A,H53B)

## 5.c Me refined with riding coordinates:

C52(H52A,H52B,H52C), C54(H54A,H54B,H54C)

## 5.d Aromatic/amide H refined with riding coordinates:

C19(H19), C18(H18), C17(H17), C25(H25), C24(H24), C23(H23), C37(H37),

C36(H36), C35(H35), C2(H2), C14(H14), C13(H13), C12(H12), C11(H11), C10(H10),

C8(H8), C7(H7), C6(H6), C5(H5), C4(H4)

## 5.e Idealised Me refined as rotating group:

C30(H30A,H30B,H30C), C32(H32A,H32B,H32C), C29(H29A,H29B,H29C), C27(H27A,H27B,

H27C), C44(H44A,H44B,H44C), C42(H42A,H42B,H42C), C41(H41A,H41B,H41C), C39(H39A,

H39B,H39C)
